1 **The detection of novel and resident marine non-indigenous species using environmental**  
2 **DNA metabarcoding of seawater and sediment**

3

4 Mr. Luke E. Holman<sup>1\*</sup> (ORCID: 0000-0002-8139-3760)

5 Dr. Mark de Bruyn<sup>2,3</sup>

6 Prof. Simon Creer<sup>2</sup>

7 Prof. Gary Carvalho<sup>2</sup>

8 Dr. Julie Robidart<sup>4</sup>

9 Dr. Marc Rius<sup>1,5</sup> (ORCID: 0000-0002-2195-6605)

10

11 <sup>1</sup> Ocean and Earth Science, National Oceanography Centre Southampton, University of  
12 Southampton, United Kingdom

13 <sup>2</sup> Molecular Ecology and Fisheries Genetics Laboratory, School of Natural Sciences, Bangor  
14 University, United Kingdom

15 <sup>3</sup> The University of Sydney, School of Life and Environmental Sciences, Australia

16 <sup>4</sup> Ocean Technology and Engineering Group, National Oceanography Centre Southampton,  
17 United Kingdom

18 <sup>5</sup> Centre for Ecological Genomics and Wildlife Conservation, University of Johannesburg, South  
19 Africa

20

21

22 \*Corresponding Author

23 Email: l.e.holman@soton.ac.uk

24

25

26

27 **Abstract**

28 1. Biodiversity monitoring in aquatic ecosystems is challenging as it requires taxonomic  
29 expertise and is difficult to automate. One expedient approach is the use of environmental DNA  
30 (eDNA) surveys to infer species incidence from nucleic acids found in environmental samples.  
31 An advantage of eDNA surveys is that they allow rapid detection of non-indigenous species  
32 (NIS), lessening the time from introduction to discovery and increasing the likelihood of  
33 successful control and / or eradication. Despite this, relatively few studies have compared eDNA  
34 and traditional surveys for the study of NIS, or examined the differences between  
35 metabarcoding of different environmental sample types.

36 2. We evaluated the ability of eDNA to detect a broad range of native and NIS in urban coastal  
37 environments, and compared the results with previously published traditional surveys. We  
38 collected water and sediment samples from the same sites and then performed eDNA  
39 metabarcoding of 18S rRNA and COI genes.

40 3. We found very different patterns of biodiversity in water and sediment samples; with sediment  
41 containing more than two times the number of operational taxonomic units (OTUs) than  
42 seawater in some cases. The findings showed the presence of as much variation in assemblage  
43 diversity among environmental sample types as amongst geographically-segregated sampling  
44 sites. Additionally, species detection within phyla was not consistent in water or sediment  
45 samples, indicating that at a broad scale sample type does not perfectly predict taxa detected.

46 4. We found almost perfect agreement in species detection from eDNA and traditional surveys.  
47 Additionally, eDNA metabarcoding detected three previously undocumented species  
48 introductions. Finally, our work provided a novel high-resolution biodiversity dataset for urban  
49 marine environments.

50 5. *Synthesis and applications* Our study showed that the type of eDNA sample dramatically  
51 affects the detected biodiversity and that eDNA metabarcoding is accurate for the detection of

52 notorious NIS. Natural resource managers, ecological practitioners and researchers should  
53 consider the benefits of integrating molecular tools such as eDNA into applied ecology.

54

55

56 **Keywords**

57 18S, COI; eDNA; sediment; metabarcoding; non-indigenous; non-native.

58

59

60

61

62

63

64

65

66

67

68

69

70

71

72

73

74

## 75 **Introduction**

76

77 Anthropogenic activities are causing a global decrease in biodiversity (Sala and Knowlton 2006;

78 Butchart et al. 2010) that negatively affects ecosystem services and function (Worm et al. 2006).

79 Such impacts create an urgent need for tools that rapidly and accurately monitor species

80 diversity. Traditional biodiversity surveys have been criticised for their lack of standardisation

81 and taxonomic resolution (Oliver & Beattie 1993; Fitzpatrick *et al.* 2009). One approach that has

82 the potential to overcome limitations of traditional surveys is the use of nucleic acids found in

83 environmental samples, such as water or sediment, to infer presence or absence of living

84 organisms in the local environment. Such genetic material, known as environmental DNA

85 (hereafter eDNA), is a poly-disperse mixture of tissue, cells, subcellular fragments and

86 extracellular DNA lost to the environment by organisms (Turner *et al.* 2014; Sassoubre *et al.*

87 2016). Studies using eDNA focus on detection from water samples using targeted (single

88 species) methods such as qPCR (Dougherty *et al.* 2016; Simpson *et al.* 2017; Wood *et al.* 2017;

89 Kim *et al.* 2018), or community (multi-species) methods such as metabarcoding (Borrell *et al.*

90 2017; Grey *et al.* 2018; Lacoursière-Roussel *et al.* 2018). Samples can be collected with minimal

91 training and once the methodology is optimised, surveys are highly amenable to automation

92 (McQuillan & Robidart 2017). Thus, eDNA surveys are highly informative (but see specific

93 considerations to ensure validity, Goldberg *et al.* 2016) and can complement traditional methods

94 (Deiner *et al.* 2017). Recent work has identified a vast range of viable protocols for the

95 collection, extraction and detection of target nucleic acids from different environmental samples

96 (Deiner et al., 2018; Spens *et al.* 2016; Sellers *et al.* 2018). Despite the finding that sediment

97 has been shown to harbour 8-1800 times more eDNA compared to water samples in freshwater

98 ecosystems (Turner, Uy & Everhart 2015) relatively few eDNA studies incorporate multiple

99 environmental sample types (Shaw *et al.* 2016). Furthermore, no work to date has compared

100 species richness estimates derived from metazoan target eDNA metabarcoding between  
101 seawater and marine sediment samples.

102  
103 Non-indigenous species (NIS) are those that have been transported from their native range  
104 through human action into a novel geographic location. The impacts of NIS are well documented  
105 and they can pose a severe threat to natural ecological systems, agriculture, biodiversity and  
106 human health (Bax *et al.* 2003; Lovell, Stone & Fernandez 2006; Ricciardi *et al.* 2013; Mazza *et*  
107 *al.* 2014). Most marine NIS have spread globally via vectors such as transoceanic shipping,  
108 aquaculture, the construction of canals interconnecting large water bodies and capture aquarium  
109 industry (Molnar *et al.* 2008; Nunes *et al.* 2014). At fine (10s of km) geographical scales, other  
110 vectors such as recreational boating significantly enhance the spread and subsequent impact of  
111 NIS (Clarke Murray *et al.* 2011). Along coastal areas, NIS studies have highlighted the  
112 importance of monitoring marinas and harbours (Ashton *et al.* 2006), as these are hotspots of  
113 NIS. In these habitats, sessile marine NIS often outcompete native species and dominate  
114 artificial hard substrata (Glasby *et al.* 2007; Dafforn *et al.* 2009). Marinas and harbours have  
115 distinct ecological and physico-chemical conditions compared to the surrounding natural  
116 environment (Rivero *et al.* 2013; Foster *et al.* 2016). Consequently, there is a need for specific  
117 sampling and surveying protocols to study both native and NIS in these ecologically distinct  
118 environments.

119  
120 The detection of NIS has been performed traditionally by surveys standardised by time or by  
121 reaching a species discovery asymptote (Ashton *et al.* 2006; Campbell, Gould & Hewitt 2007;  
122 Bishop *et al.* 2015). Moreover, traditional NIS surveys require expert taxonomic skills that are  
123 inherently time consuming and are not typically amenable to automation (Darling *et al.* 2017). In  
124 addition, the results of such surveys reflect only species that are being targeted at the time, with  
125 no ability to retrospectively separate erroneously grouped species in light of new discoveries.

126 This is particularly important considering that between 9,000-35,000 marine species (2.7% of  
127 the total number of estimated marine species) are cryptic (i.e., morphologically similar but  
128 genetically distinct) (Appeltans *et al.* 2012). Indeed, many common global sessile marine  
129 invaders are morphologically indistinguishable and contain cryptic lineages as revealed by  
130 genetic studies, highlighting the need for the use of genetic tools to accurately assess species  
131 invasions (Pérez-Portela *et al.* 2013; Rius *et al.* 2017). The use of eDNA as monitoring tool of  
132 NIS has great potential, mainly because it tackles limitations of the existing biodiversity  
133 monitoring tools.

134  
135 Here we tested the efficacy of eDNA metabarcoding for exploring the biodiversity of several  
136 distinct marinas. We first documented the differences in both alpha and beta diversity of different  
137 eDNA sample types (seawater and sediment). We then compared the eDNA metabarcoding  
138 results with traditional methods and identified a number of key NIS that are both introduced in  
139 the study region and / or elsewhere. Subsequently, we identified a number of previously  
140 unrecorded NIS in the study region. Finally we discuss the strengths and weaknesses of eDNA  
141 metabarcoding for detecting marine NIS.

142

143

## 144 **Methods**

145

### 146 *Study sites*

147 Four marinas were selected from around the United Kingdom to represent variation in modelled  
148 invasion potential (Pearce, Peeler & Stebbing 2012), known NIS present (Bishop *et al.* 2015)  
149 and surrounding benthic habitat type (Calewaert *et al.* 2016). Importantly, all chosen marinas  
150 have been surveyed previously for NIS and so there is a good understanding of the expected  
151 NIS in these areas (Wood, Bishop & Yunnie 2015a; b; Wood *et al.* 2016). Marina access was

152 contingent on anonymity and so marina names and exact locations are not presented, Fig.1a  
153 shows approximate locations. Marina *TQ* is an open marina subject to tides and varying salinity  
154 located in Southampton Water on the north coast of the English Channel. Marina *PQ* is a loch  
155 marina open during high tide to the Bristol Channel and the Celtic Sea. Marina *TB* is located at  
156 the mouth of the River Blackwater open to the North Sea. Marina *HH* is located on the Isle of  
157 Anglesey and is open to the Celtic Sea.

158

### 159 *Environmental DNA sampling*

160 Surveys were conducted during May 2017. A total of 24 sampling points were randomly selected  
161 within each site. At each point 50ml of water was collected from 10cm below the surface using a  
162 sterile 60ml luer lock syringe and filtered through a 0.22mm polyethersulfone Sterivex filter  
163 (Merck Millipore, Massachusetts USA). After collecting seawater from eight locations (400ml  
164 total volume) the filter was changed, resulting in a total of three filters per site. To test the effect  
165 of different sample preservation methods sampling was performed in duplicate. One set of three  
166 filters had ~1.5ml sterile Longmire's solution (100mM Tris, 10mM EDTA, 10mM NaCl, 0.5%  
167 SDS) applied in the inlet valve (Renshaw et al. 2015). The second set of three filters were kept  
168 on ice for no longer than eight hours before being frozen at -20°C. During the surveys, a  
169 sediment sample was collected at the start and then after every 3rd water sample, for a total of 9  
170 per site. We used a UWITEC Corer (UWITEC, Mondsee, Austria) to collect a sediment core  
171 (600mm tall x 60mm diameter). Using a sterile disposable spatula, a subsample of 10-20g of  
172 sediment was taken from the top 2cm of the core, taking care to avoid sampling the sides of the  
173 core. The subsample was stored in a sterile plastic zip container and kept on ice for no longer  
174 than eight hours before begin frozen at -80°C. Due to equipment malfunction no sediment  
175 sample could be taken for Site HH. Disposable gloves were changed after collection of each  
176 sample. All reused equipment was washed thoroughly and soaked in 10% bleach between sites,  
177 before rinsing in DNase-free sterile water.

178

179 *eDNA extraction*

180 DNA extractions were performed in a PCR-free cleanroom, separate from main laboratory  
181 facilities. No high copy templates, cultures or amplicons were permitted in this sterile laboratory.  
182 DNA extractions from water samples followed Spens et al. (2016) using the SX<sub>CAPSULE</sub> method.  
183 Briefly, preservative solution was removed from the outlet and filters were dried at room  
184 temperature for two hours, 720µl Qiagen buffer ATL (Qiagen, Hilden, Germany) and 80µl  
185 Proteinase K was added to the filter and all samples were digested overnight at 56°C. After  
186 digestion, samples were processed using the Qiagen DNeasy Blood and Tissue Kit as per  
187 manufacturer instructions. The final elution was 200µl PCR grade water.

188 Sediment extractions were performed using the Qiagen DNeasy Powermax Soil Kit using the  
189 manufacturer recommended protocol. For each site the nine samples were mixed to form three  
190 pooled samples; for each extraction, 10g of pooled sample was processed. A total of ten  
191 samples were processed, three each per site with a single no blank, as per manufacturer's  
192 instructions.

193

194 *Inhibition testing*

195 To ensure extracted DNA was free of PCR inhibitors a Primer Design Real-Time PCR Internal  
196 Control Kit (PrimerDesign, Southampton, UK) was used. qPCR reactions were performed  
197 following the manufacturer's protocol. Inhibition due to co-purified compounds from DNA  
198 extraction protocols would produce an increase in cycle threshold number in comparison to no  
199 template controls. All samples were successfully processed and no samples showed indication  
200 of PCR inhibition.

201

202 *Primer selection & library preparation*



203 Two sets of primers were chosen for metabarcoding the environmental samples: a 313bp  
204 section of the standard DNA barcoding region of the cytochrome c oxidase subunit I gene (COI)  
205 using primers described in Leray et al. (2013); and a variable length target of the hypervariable  
206 v4 region of the nuclear small subunit ribosomal DNA (18S) using primers from Zhan *et al.*  
207 (2013). Sequencing libraries were prepared using a 2-step PCR approach as detailed in Bista *et*  
208 *al.* (2017), this method amplifies the target region in PCR 1 annealing universal adapters onto  
209 which sample specific indices and sequencing primers are annealed in PCR 2. In contrast to  
210 Bista *et al.* (2017) we used unique dual-matched indexes for PCR 2 to avoid index crosstalk  
211 associated with combinatorial indexing (MacConaill et al. 2018). PCR 1 was prepared in a PCR-  
212 free room, separate from main laboratory facilities. PCR conditions and reaction volumes are  
213 detailed in Supplementary Information 1. Blank filters, DNA extraction kits and positive controls  
214 where collected, extracted and sequenced as the experimental treatments (detailed in  
215 Supplementary Information 1). Samples were pooled at an equimolar ratio and sequenced using  
216 the Illumina MiSeq instrument (Illumina, San Diego, USA) with a V3 2 x 300bp kit.

217

### 218 *Bioinformatic analyses*

219 Samples were demultiplexed using the Illumina MiSeq control software (v 2.6.2.1). The  
220 demultiplexed data was analysed using a custom pipeline written in the R programming  
221 language (R Core Team 2018) hosted at <https://github.com/leholman/metabarTOAD>, the steps  
222 are as follows. Forward and reverse paired end reads were merged using the `-fastq_mergepairs`  
223 option of USEARCH v.10.0.240 (Edgar 2013) with maximum difference of 15, percent identity of  
224 80% and quality filter set at maximum expected errors of 1. Both the forward and reverse primer  
225 sequences were matched using Cutadapt v.1.16 (Martin 2011) and only sequences containing  
226 both primer regions were retained. Sequences were discarded if they were outside of a defined  
227 length boundary (303-323bp for COI, 375-450bp for 18S) using Cutadapt. Sequences were then  
228 pooled, singletons were discarded and sequences were quality filtered with a maximum

229 expected error of 1 using the `-fastq_filter` option of `vsearch v.2.4.3` (Rognes *et al.* 2016).  
230 Sequences were then denoised and chimeras filtered using the `unoise3` algorithm implemented  
231 in `USEARCH`. The resultant OTUs were curated using the `LULU` package v.0.1.0 in R (Frøslev  
232 *et al.* 2017). An OTU by sample table was produced by mapping the merged and trimmed reads  
233 against the curated OTUs, reporting a single best hit within 97% of the query sequence. The  
234 OTU x sample table was filtered in R as follows. To minimise the chance of spurious OTUs  
235 being included in the final dataset any record with less than 3 raw reads were changed to zero  
236 and any OTU that did not appear in more than one sample was removed from the analysis.  
237 OTUs found in negative controls were removed from the analysis.

238

### 239 *Taxonomic assignment*

240 Assigning correct taxonomy to an unknown set of marine sequences can be challenging as  
241 large databases require vast computational resources for query matching; many databases  
242 contain errors and the taxonomy of some marine groups is uncertain. With such limitations in  
243 mind, we assigned taxonomy using a `BLAST v.2.6.0+` search (Camacho *et al.* 2009) returning  
244 the single best hit from databases within 97% of the query. The MIDORI database  
245 (UNIQUE\_20180221) (Machida *et al.* 2017) was used for the COI data and the SILVA database  
246 (SSU r132) (Quast *et al.* 2013) was used for the 18S rRNA data. The `match taxa` tool from the  
247 World Register of Marine Species (WoRMS) (WoRMS Editorial Board 2018) was used to filter  
248 the data for marine species and check the classification. Remaining annotations were checked  
249 against the World Register of Introduced Marine Species (WRIMS) (Ahyong *et al.* 2018) to  
250 determine non-indigenous status.

251

### 252 *Statistical analyses*

253 All statistical analyses were conducted in R v3.5.0. The `Vegan` R package v.2.5.2 (Oksanen *et*  
254 *al.* 2011) was used to rarefy samples to the minimum sample read depth for each amplicon. The

255 number of OTUs per site/condition was calculated as the number of OTUs with a non-zero  
256 number of normalized reads after summing the reads across all three site level replicates. To  
257 test if there was a significant difference between the number of OTUs generated by sediment  
258 and water eDNA, individual non-summed replicate sample data was used to build a linear  
259 regression model following the formula *number\_of\_OTUs~sedimentorwater\*site* implemented in  
260 R using the function `lm()`. Non-metric multidimensional scaling ordination plots were generated  
261 from Bray-Curtis dissimilarity values derived using `Vegan`. A Permutation Analysis of Variance  
262 (PERMANOVA) (Balakrishnan et al. 2014) was performed using the Bray Curtis dissimilarity  
263 following the model *dissimilarity\_matrix~sedimentorwater\*site* implemented in R using the  
264 function `adonis` from the `vegan` package. OTUs with taxonomic assignment were separated into  
265 those found in sediment, water or both media and the OTUs were then collapsed at the Phylum  
266 level to explore taxonomic patterns of detection in water or sediment. Phyla with less than eight  
267 OTUs were combined. To test for non-random counts of species detection between water and  
268 sediment within taxa an exact binomial test was performed between counts of species detected  
269 in water and sediment. Half the number of counts for species detected in both water and  
270 sediment were added to water and sediment, with non-integer values conservatively rounded up  
271 to the nearest whole number. A Bonferroni correction for multiple comparisons was applied  
272 across the p values from the exact binomial tests. Records from manual surveys previously  
273 conducted for non-native invertebrates at the sample sites (Wood, Bishop & Yunnie 2015a; b;  
274 Wood *et al.* 2016) were compared with the detected species from metabarcoding data.

275

276

## 277 **Results**

278

279 *Raw sequencing results & OTU generation*

280 Sequencing produced a total of 17.8 million paired end reads, with 15.2 million sequences  
281 remaining after paired end read merging and quality filtering. The average number of sequences  
282 per sample after filtering (excluding control samples) was  $200,185 \pm 64,019$  (s.d). No template  
283 control samples contained an average of  $811 \pm 3,402$  (s.d) sequences. One control sample  
284 contained ~15,000 sequences that mapped to an operational taxonomic unit (OTU) that had  
285 100% identity match to a sequence of a terrestrial fungi (Genbank: FJ804151.1), excluding this  
286 OTU gives an average of  $51 \pm 94$  (s.d) sequences per no-template control sample. Denoising  
287 produced 8,069 OTUs for COI and 2,433 for 18S with 6,435 and 1,679 remaining respectively  
288 after LULU curation. Taxonomic annotation identified 395 OTUs from the 18S rRNA dataset  
289 against the SILVA database and 219 OTUs from the COI dataset against the MIDORI database.  
290 Taxonomic data from WoRMS could be retrieved for 204 of the annotated COI OTUs and 138 of  
291 the 18S OTUs.

292

### 293 *Biodiversity detection*

294

295 The effect of different water eDNA sample preservation techniques differed between the target  
296 amplicons. The 18S rRNA amplicon produced significantly more OTUs in samples preserved by  
297 freezing compared to Longmire's preservation method, while the COI amplicon showed no  
298 significant difference between preservation treatments (see Supplementary Information 2 for  
299 details). As a conservative approach all subsequent analyses used sample data from frozen  
300 samples. The minimum number of reads per sample was 137,624 for the COI dataset and  
301 117,915 for the 18S dataset and so samples were rarefied to this number of reads. More OTUs  
302 in total were detected in the sediment samples compared to the water samples across all sites  
303 and both markers as shown in Figure 1b,d. In all cases, both water and sediment samples  
304 detected unique OTUs but the mean proportion of unique OTUs detected in water was lower  
305 (49.2%) in comparison to sediment (73.8%). A 2-way ANOVA testing the effect of eDNA type of

306 environmental sample on number of OTUs generated indicated a significant effect ( $p < 0.001$ ) of  
307 sample type for both 18S rRNA and COI (See Supplementary Information 3 for full model  
308 output). Ordination plots of Bray-Curtis dissimilarity (Fig. 1c,e) showed that OTUs in eDNA found  
309 in sediment and water differ in community structure as much as among sites in ordination space.  
310 Additionally, the PERMANOVA model indicated highly significant differences ( $p < 0.001$ ) between  
311 sites and eDNA medium in both the 18S rRNA and COI datasets. Furthermore, eDNA detection  
312 medium in the PERMANOVA model explained 23.2% and 32.5% of the variation in the 18S and  
313 COI data respectively, while the site explained 34.2% and 30.5% in the COI and 18S rRNA data  
314 (See Supplementary Information 4 for full model output). At phylum level (Figure 2), taxonomy  
315 does not perfectly predict medium of detection, however a binomial goodness of fit test shows  
316 non-random detection proportions in the Nematoda (Bonferroni corrected  $p = 0.005$ ), with eDNA  
317 detections mostly in sediment.

318

### 319 *Detection of non-indigenous species*

320 In total 16 NIS to the study region and 30 species documented as NIS in other countries were  
321 detected across the four sites (see Supplementary Table 1 for full list). Out of the detected NIS  
322 seven were present in the list of 21 NIS previously detected in manual non-native invertebrate  
323 surveys at the sites. As shown in Fig. 3 the results of the eDNA surveys closely matched those  
324 of the manual survey results. Only a single detection differed from the manual surveys, an eDNA  
325 false-negative detection of *Bugula neritina* at Site HH. Remapping of the cleaned reads to the  
326 *Bugula neritina* COI region (Genbank Accession: KY235450.1) indicated that 5 reads from a  
327 single replicate corresponded with *Bugula neritina*. These reads were lost during data filtering  
328 and so did not feature in the final dataset. A detection of note was 199 reads from the sediment  
329 of Site TQ mapping to an OTU corresponding with *Arcuatula senhousia* (Asian Date Mussel), a  
330 previously undocumented NIS for the UK. Targeted visual surveys on tidal mudflats within two  
331 kilometres of Marina TQ confirmed the presence of this species in proximity to the sampling site.

332 Furthermore, COI sequences generated from these physical samples (Genbank Accession:  
333 MH924820 and MH924821) matched to known *A. senhousia* sequences confirming the eDNA  
334 detection (see Supplementary Information 5 for details of DNA barcoding). Additionally, the  
335 nematode *Cephalothrix simula* and the oligochaete *Paranais frici* were also detected using  
336 eDNA at site TQ. Both are new species introductions to the United Kingdom, previously  
337 undocumented in academic literature.

338

### 339 **Discussion**

340

341 We demonstrated that very different community composition can be detected in seawater and  
342 sediment samples, affirming the importance of integrating multiple sample types for obtaining a  
343 full assessment of community composition. We also found that eDNA metabarcoding shows  
344 excellent concordance with traditional methods for the detection of NIS. Finally, we  
345 demonstrated that eDNA metabarcoding can detect novel species introductions. This study  
346 emphasises the need to have a thorough understanding of the effects of environmental sample  
347 types both at the level of whole community and for specific species of concern. eDNA  
348 metabarcoding continues to be used in both regional and global biodiversity surveys.

349

350 The majority of research using eDNA to detect aquatic macrofauna is based on the collection of  
351 water samples, while sediment samples have received comparatively less attention. We found  
352 dramatic differences in species richness in sediment and water samples, observing a  
353 consistently greater number of OTUs detected in sediment compared to water. Shaw *et al.*  
354 (2016) found that sediment 12S rRNA metabarcoding detected fewer fish compared to water in  
355 a freshwater lotic environment. Our results indicated a similar trend when considering only fish  
356 species; with more fish being detected in seawater samples compared to sediment samples (5  
357 in water, 2 in sediment and water), but the opposite when considering all OTUs. More broadly,

358 taxonomy at the level of phylum did not predict if a species will be detected in water, sediment or  
359 both sample types (except the Nematoda, whose members are predominantly benthic  
360 inhabitants). It is likely, as seen in the case of fish above, that at lower taxonomic levels the  
361 species-specific ecology of eDNA (sensu Barnes & Turner 2015) will result in convergent eDNA  
362 occupancy in different sample types. However, further work is needed to clarify how eDNA  
363 partitions into adjacent environmental samples across the tree of life. Our study showed that at  
364 the level of phyla detection was not significantly different between sediment and water for most  
365 taxa. Similarly, we showed that for most NIS both water or sediment samples served as an  
366 excellent media for detection.

367  
368 Current eDNA metabarcoding research has identified large variation in the detected diversity  
369 across small spatial scales in both sediment (Nascimento *et al.* 2018) and seawater (O'Donnell  
370 *et al.* 2017). Additionally fractionation of environmental samples (i.e. sorting samples by particle  
371 size class) can produce significant differences in the metabarcoding results between fractions  
372 (Wangensteen *et al.* 2018a; b) indicating that reliable variation can be discovered at a scale of  
373 site. Here we found similar patterns, with site and eDNA sample type containing approximately  
374 equivalent OTU biodiversity. Future research should explore how eDNA extracted using different  
375 sample types and extraction methods affects the detection of biodiversity, especially as eDNA  
376 metabarcoding moves from an experimental technique to a routine monitoring tool (Pawlowski *et*  
377 *al.* 2018; Aylagas *et al.* 2018).

378  
379 We found that eDNA metabarcoding of water samples accurately detects many NIS species, as  
380 seen in previous work (Borrell *et al.* 2017; Grey *et al.* 2018; Lacoursière-Roussel *et al.* 2018).  
381 Additionally, we identified the presence of NIS in sediment samples for the first time. In  
382 comparing these data to those collected using traditional methods we found almost perfect  
383 agreement in NIS presence. The single false-negative was found to be a result of bioinformatic

384 parameters, identifying that choices made during sequence processing can have an effect on  
385 the detectability of species in eDNA samples. Indeed, this has previously been shown in  
386 metabarcoding of bulk samples (Scott *et al.* 2018) and work is urgently needed to determine  
387 optimal bioinformatic parameters, the effects of primer binding sites and the role of DNA  
388 barcodes in reference databases for the detection of NIS in eDNA samples. It is therefore  
389 important to combine eDNA metabarcoding with traditional surveys where possible, as both  
390 methods provide reciprocal validation data (e.g. important NIS may be missed using molecular  
391 techniques or eDNA metabarcoding detects rare species that often missed by traditional  
392 surveys). We identified several NIS currently unrecorded in the UK and confirmed the detection  
393 with targeted local surveys to confirm the presence of *A. senhousia*. The case of *A. senhousia* is  
394 particularly relevant when evaluating eDNA metabarcoding for NIS detection as the species is  
395 spreading globally (Bachelet *et al.* 2009), has the potential to dramatically alter benthic  
396 biodiversity (Crooks 2001; Mistri 2003) and may have long remained undetected. Future  
397 research should evaluate the sensitivity of eDNA metabarcoding for the detection of novel  
398 species introductions, which may allow an unprecedented level of accuracy during early stages  
399 of invasion. The incorporation of autonomous sampling (McQuillan & Robidart 2017) and eDNA  
400 biobanking (Jarman, Berry & Bunce 2018) could also help the rapid detection of NIS by  
401 improving DNA reference databases for specific geographical regions that have high biosecurity  
402 risk, providing an invaluable resource for biodiversity managers and researchers alike.

403

404

405

406

407

408

409



410

411 **Author Contributions**

412 L.E.H. and M.R. designed the experiment, L.E.H. collected samples, generated and analysed  
413 the data, designed all figures and wrote the first draft of the paper. All authors contributed  
414 critically to the drafts and gave final approval for publication.

415

416

417 **Acknowledgements**

418 We are grateful to the Bishop Lab (Marine Biological Association) and affiliates for excellent NIS  
419 survey data and for sharing information on marinas. We acknowledge staff in the Environmental  
420 Sequencing Facility at the National Oceanography Centre Southampton for advice and  
421 assistance during library preparation. We acknowledge the Department of Geography &  
422 Environment from the University of Southampton for access to coring equipment and lab space.  
423 LH was supported by the Natural Environmental Research Council (grant number  
424 NE/L002531/1).

425

426 **Data accessibility**

427 Raw Illumina sequencing data is available from the European Nucleotide Archive under  
428 accession number (pending).

429 Associated metadata, script and intermediate files can be found on GitHub with the following  
430 DOI: 10.5281/zenodo.1453959.

431

432

433

434

435

436 **References**

437

438 Ahyong, S., Costello, M.J., Galil, B.S., Gollasch, S., Hutchings, P., Katsanevakis, ... Zhan, A.  
439 (2018) <http://www.marinespecies.org/introduced>

440 Anderson, M.J. (2014) Permutational Multivariate Analysis of Variance (PERMANOVA).  
441 *Wiley Stats Ref: Statistics Reference Online* (eds N. Balakrishnan, T. Colton, B. Everitt,  
442 W. Piegorisch, F. Ruggeri, & J.L. Teugels), pp. 1–15. John Wiley & Sons, Ltd,  
443 Chichester, UK.

444 Appeltans, W., Ahyong, S.T., Anderson, G., Angel, M.V., Artois, T., Bailly, N., ... Costello,  
445 M.J. (2012) The magnitude of global marine species diversity. *Current Biology*, **22**,  
446 2189–2202.

447 Ashton, G., Boos, K., Shucksmith, R. & Cook, E. (2006) Rapid assessment of the distribution  
448 of marine non-native species in marinas in Scotland. *Aquatic Invasions*, **1**, 209–213.

449 Aylagas, E., Borja, Á., Muxika, I. & Rodríguez-Ezpeleta, N. (2018) Adapting metabarcoding-  
450 based benthic biomonitoring into routine marine ecological status assessment  
451 networks. *Ecological indicators*, **95**, 194–202.

452 Bachelet, G., Blanchet, H., Cottet, M., Dang, C., de Montaudouin, X., de Moura Queirós, A.,  
453 Gouillieux, B. & Lavesque, N. (2009) A round-the-world tour almost completed: first  
454 records of the invasive mussel *Musculista senhousia* in the north-east Atlantic  
455 (southern Bay of Biscay). *Marine Biodiversity Records*, **2**, 2002–2005.

456 Barnes, M.A. & Turner, C.R. (2015) The ecology of environmental DNA and implications for  
457 conservation genetics. *Conservation Genetics*, **17**, 1–17.

- 458 Bax, N., Williamson, A., Agüero, M., Gonzalez, E. & Geeves, W. (2003) Marine invasive alien  
459 species: a threat to global biodiversity. *Marine Policy*, **27**, 313–323.
- 460 Bishop, J., Wood, C., Yunnice, A. & Griffiths, C. (2015) Unheralded arrivals: non-native sessile  
461 invertebrates in marinas on the English coast. *Aquatic Invasions*, **10**, 249–264.
- 462 Bista, I., Carvalho, G.R., Walsh, K., Seymour, M., Hajibabaei, M., Lallias, D., Christmas, M. &  
463 Creer, S. (2017) Annual time-series analysis of aqueous eDNA reveals ecologically  
464 relevant dynamics of lake ecosystem biodiversity. *Nature Communications*, **8**, 14087.
- 465 Borrell, Y.J., Miralles, L., Do Huu, H., Mohammed-Geba, K. & Garcia-Vazquez, E. (2017)  
466 DNA in a bottle—Rapid metabarcoding survey for early alerts of invasive species in  
467 ports. *PloS One*, **12**, e0183347.
- 468 Butchart, S.H.M., Walpole, M., Collen, B., van Strien, A., Scharlemann, J.P.W., Almond,  
469 R.E.A., ... Watson, R. (2010) Global biodiversity: indicators of recent declines. *Science*,  
470 **328**, 1164–1168.
- 471 Calewaert, J.-B., Weaver, P., Gunn, V., Gorringer, P. & Novellino, A. (2016) The European  
472 Marine Data and Observation Network (EMODnet): Your Gateway to European Marine  
473 and Coastal Data. *Quantitative Monitoring of the Underwater Environment: Results of  
474 the International Marine Science and Technology Event MOQESM'14 in Brest, France*  
475 (eds B. Zerr, L. Jaulin, V. Creuze, N. Debese, I. Quidu, B. Clement, & A. Billon-Coat),  
476 pp. 31–46. Springer International Publishing, Cham.
- 477 Camacho, C., Coulouris, G., Avagyan, V., Ma, N., Papadopoulos, J., Bealer, K. & Madden,  
478 T.L. (2009) BLAST+: architecture and applications. *BMC Bioinformatics*, **10**, 421.
- 479 Campbell, M.L., Gould, B. & Hewitt, C.L. (2007) Survey evaluations to assess marine  
480 bioinvasions. *Marine Pollution Bulletin*, **55**, 360–378.

- 481 Clarke Murray, C., Pakhomov, E.A. & Therriault, T.W. (2011) Recreational boating: a large  
482 unregulated vector transporting marine invasive species: Transport of NIS by  
483 recreational boats. *Diversity and Distributions*, **17**, 1161–1172.
- 484 Crooks, J.A. (2001) Assessing Invader Roles Within Changing Ecosystems: Historical and  
485 Experimental Perspectives on an Exotic Mussel in an Urbanized Lagoon. *Biological*  
486 *Invasions*, **3**, 23–36.
- 487 Dafforn, K.A., Johnston, E.L. & Glasby, T.M. (2009) Shallow moving structures promote  
488 marine invader dominance. *Biofouling*, **25**, 277–287.
- 489 Darling, J.A., Galil, B.S., Carvalho, G.R., Rius, M., Viard, F. & Piraino, S. (2017)  
490 Recommendations for developing and applying genetic tools to assess and manage  
491 biological invasions in marine ecosystems. *Marine Policy*, **85**, 56–64.
- 492 Deiner, K., Bik, H.M., Mächler, E., Seymour, M., Lacoursière-Roussel, A., Altermatt, F., ...  
493 Bernatchez, L. (2017) Environmental DNA metabarcoding: Transforming how we  
494 survey animal and plant communities. *Molecular Ecology*, **26**, 5872–5895.
- 495 Deiner, K., Lopez, J., Bourne, S., Holman, L.E., Seymour, M., Gray, E.K., ... Lodge, D.M. *In*  
496 *press*. Optimizing the detection of marine taxonomic richness using environmental DNA  
497 metabarcoding: the effects of filter material, pore size, and extraction method.  
498 *Metabarcoding & Metagenomics*
- 499 Dougherty, M.M., Larson, E.R., Renshaw, M.A., Gantz, C.A., Egan, S.P., Erickson, D.M. &  
500 Lodge, D.M. (2016) Environmental DNA (eDNA) detects the invasive rusty crayfish  
501 *Orconectes rusticus* at low abundances. *The Journal of applied ecology*, **53**, 722–732.
- 502 Edgar, R.C. (2013) UPARSE: highly accurate OTU sequences from microbial amplicon  
503 reads. *Nature Methods*, **10**, 996–998.

- 504 Fitzpatrick, M.C., Preisser, E.L., Ellison, A.M. & Elkinton, J.S. (2009) Observer bias and the  
505 detection of low-density populations. *Ecological applications: a publication of the*  
506 *Ecological Society of America*, **19**, 1673–1679.
- 507 Foster, V., Giesler, R.J., Wilson, A.M.W., Nall, C.R. & Cook, E.J. (2016) Identifying the  
508 physical features of marina infrastructure associated with the presence of non-native  
509 species in the UK. *Marine biology*, **163**, 173.
- 510 Frøslev, T.G., Kjøller, R., Bruun, H.H., Ejrnæs, R., Brunbjerg, A.K., Pietroni, C. & Hansen,  
511 A.J. (2017) Algorithm for post-clustering curation of DNA amplicon data yields reliable  
512 biodiversity estimates. *Nature Communications*, **8**, 1188.
- 513 Glasby, T.M., Connell, S.D., Holloway, M.G. & Hewitt, C.L. (2007) Nonindigenous biota on  
514 artificial structures: could habitat creation facilitate biological invasions? *Marine Biology*,  
515 **151**, 887–895.
- 516 Goldberg, C.S., Turner, C.R., Deiner, K., Klymus, K.E., Thomsen, P.F., Murphy, M.A., ...  
517 Taberlet, P. (2016) Critical considerations for the application of environmental DNA  
518 methods to detect aquatic species ed M. Gilbert. *Methods in Ecology and Evolution*, **7**,  
519 1299–1307.
- 520 Grey, E.K., Bernatchez, L., Cassey, P., Deiner, K., Deveney, M., Howland, K.L., ...Lodge,  
521 D.M. (2018) Effects of sampling effort on biodiversity patterns estimated from  
522 environmental DNA metabarcoding surveys. *Scientific Reports*, **8**, 8843.
- 523 Jarman, S.N., Berry, O. & Bunce, M. (2018) The value of environmental DNA biobanking for  
524 long-term biomonitoring. *Nature Ecology & Evolution*.

- 525 Kim, P., Kim, D., Yoon, T.J. & Shin, S. (2018) Early detection of marine invasive species,  
526 *Bugula neritina* (Bryozoa: Cheilostomatida), using species-specific primers and  
527 environmental DNA analysis in Korea. *Marine Environmental Research*, **139**, 1–10.
- 528 Lacoursière-Roussel, A., Howland, K., Normandeau, E., Grey, E.K., Archambault, P., Deiner,  
529 K., Lodge, D.M., Hernandez, C., Leduc, N. & Bernatchez, L. (2018) eDNA  
530 metabarcoding as a new surveillance approach for coastal Arctic biodiversity. *Ecology*  
531 *and Evolution*, **26**, 146.
- 532 Leray, M., Yang, J.Y., Meyer, C.P., Mills, S.C., Agudelo, N., Ranwez, V., Boehm, J.T. &  
533 Machida, R.J. (2013) A new versatile primer set targeting a short fragment of the  
534 mitochondrial COI region for metabarcoding metazoan diversity: application for  
535 characterizing coral reef fish gut contents. *Frontiers in Zoology*, **10**, 34.
- 536 Lovell, S.J., Stone, S.F. & Fernandez, L. (2006) The Economic Impacts of Aquatic Invasive  
537 Species: A Review of the Literature. *Agricultural and Resource Economics Review*, **35**,  
538 195–208.
- 539 MacConaill, L.E., Burns, R.T., Nag, A., Coleman, H.A., Slevin, M.K., Giorda, ... Thorner, A.R.  
540 (2018) Unique, dual-indexed sequencing adapters with UMIs effectively eliminate index  
541 cross-talk and significantly improve sensitivity of massively parallel sequencing. *BMC*  
542 *Genomics*, **19**, 30.
- 543 Machida, R.J., Leray, M., Ho, S.-L. & Knowlton, N. (2017) Metazoan mitochondrial gene  
544 sequence reference datasets for taxonomic assignment of environmental samples.  
545 *Scientific Data*, **4**, 170027.
- 546 Martin, M. (2011) Cutadapt removes adapter sequences from high-throughput sequencing  
547 reads. *EMBnet.journal*, **17**, 10–12.

- 548 Mazza, G., Tricarico, E., Genovesi, P. & Gherardi, F. (2014) Biological invaders are threats to  
549 human health: an overview. *Ethology Ecology & Evolution*, **26**, 112–129.
- 550 McQuillan, J.S. & Robidart, J.C. (2017) Molecular-biological sensing in aquatic environments:  
551 recent developments and emerging capabilities. *Current Opinion in Biotechnology*, **45**,  
552 43–50.
- 553 Mistri, M. (2003) The non-indigenous mussel *Musculista senhousia* in an Adriatic lagoon:  
554 effects on benthic community over a ten year period. *Journal of the Marine Biological*  
555 *Association of the United Kingdom*, **83**, 1277–1278.
- 556 Molnar, J.L., Gamboa, R.L., Revenga, C. & Spalding, M.D. (2008) Assessing the global threat  
557 of invasive species to marine biodiversity. *Frontiers in Ecology and the Environment*, **6**,  
558 485–492.
- 559 Nascimento, F.J.A., Lallias, D., Bik, H.M. & Creer, S. (2018) Sample size effects on the  
560 assessment of eukaryotic diversity and community structure in aquatic sediments using  
561 high-throughput sequencing. *Scientific Reports*, **8**, 11737.
- 562 Nunes, A.L., Katsanevakis, S., Zenetos, A. & Cardoso, A.C. (2014) Gateways to alien  
563 invasions in the European seas. *Aquatic Invasions*, **9**, 133–144.
- 564 O'Donnell, J.L., Kelly, R.P., Shelton, A.O., Samhuri, J.F., Lowell, N.C. & Williams, G.D.  
565 (2017) Spatial distribution of environmental DNA in a nearshore marine habitat. *PeerJ*,  
566 **5**, e3044.
- 567 Oksanen, J., Blanchet, F.G., Kindt, R., Legendre, P., Minchin, P.R., O'hara, R.B., ... Wagner,  
568 H. (2011) vegan: Community ecology package. *R package version*, 117–118.

- 569 Oliver, I. & Beattie, A.J. (1993) A Possible Method for the Rapid Assessment of Biodiversity.  
570 *Conservation Biology*, **7**, 562–568.
- 571 Pawlowski, J., Kelly-Quinn, M., Altermatt, F., Apothéoz-Perret-Gentil, L., Beja, P., Boggero,  
572 A.,... Kahlert, M. (2018) The future of biotic indices in the ecogenomic era: Integrating  
573 (e)DNA metabarcoding in biological assessment of aquatic ecosystems. *The Science of*  
574 *the Total Environment*, **637-638**, 1295–1310.
- 575 Pearce, F., Peeler, E. & Stebbing, P. (2012) *Modelling the Risk of the Introduction and*  
576 *Spread of Non-Indigenous Species in the UK and Ireland; Project Report for E5405W.*  
577 CEFAS.
- 578 Pérez-Portela, R., Arranz, V., Rius, M. & Turon, M. (2013) Cryptic speciation or global  
579 spread? The case of a cosmopolitan marine invertebrate with limited dispersal  
580 capabilities. *Scientific Reports*, **3**, 3197.
- 581 Quast, C., Pruesse, E., Yilmaz, P., Gerken, J., Schweer, T., Yarza, P., Peplies, J. &  
582 Glöckner, F.O. (2013) The SILVA ribosomal RNA gene database project: improved  
583 data processing and web-based tools. *Nucleic Acids Research*, **41**, D590–6.
- 584 R Core Team. (2018) *R: A Language and Environment for Statistical Computing*. ISBN 3-  
585 900051-07-0.
- 586 Renshaw, M.A., Olds, B.P., Jerde, C.L., Mcveigh, M.M. & Lodge, D.M. (2015) The room  
587 temperature preservation of filtered environmental DNA samples and assimilation into a  
588 phenol-chloroform-isoamyl alcohol DNA extraction. *Molecular Ecology Resources*, **15**,  
589 168–176.



- 590 Ricciardi, A., Hoopes, M.F., Marchetti, M.P. & Lockwood, J.L. (2013) Progress toward  
591 understanding the ecological impacts of nonnative species. *Ecological Monographs*, **83**,  
592 263–282.
- 593 Rius, M., Teske, P.R., Maríquez, P.H., Suárez-Jiménez, R., McQuaid, C.D. & Castilla, J.  
594 (2017) Ecological dominance along rocky shores, with a focus on intertidal ascidians.  
595 *Oceanography and Marine Biology*. pp. 55–86.
- 596 Rivero, N.K., Dafforn, K.A., Coleman, M.A. & Johnston, E.L. (2013) Environmental and  
597 ecological changes associated with a marina. *Biofouling*, **29**, 803–815.
- 598 Rognes, T., Flouri, T., Nichols, B., Quince, C. & Mahé, F. (2016) VSEARCH: a versatile open  
599 source tool for metagenomics. *PeerJ*, **4**, e2584.
- 600 Sala, E. & Knowlton, N. (2006) Global Marine Biodiversity Trends. *Annual Review of*  
601 *Environment and Resources*, **31**, 93–122.
- 602 Sassoubre, L.M., Yamahara, K.M., Gardner, L.D., Block, B.A. & Boehm, A.B. (2016)  
603 Quantification of Environmental DNA (eDNA) Shedding and Decay Rates for Three  
604 Marine Fish. *Environmental Science & Technology*, **50**, 10456–10464.
- 605 Scott, R., Zhan, A., Brown, E.A., Chain, F.J.J., Cristescu, M.E., Gras, R. & MacIsaac, H.J.  
606 (2018) Optimization and performance testing of a sequence processing pipeline applied  
607 to detection of nonindigenous species. *Evolutionary Applications*, **11**, 891–905.
- 608 Sellers, G.S., Di Muri, C., Gómez, A. & Hänfling, B. (2018) Mu-DNA: a modular universal  
609 DNA extraction method adaptable for a wide range of sample types. *Metabarcoding*  
610 *and Metagenomics*, **2**, e24556.

- 611 Shaw, J.L.A., Clarke, L.J., Wedderburn, S.D., Barnes, T.C., Weyrich, L.S. & Cooper, A.  
612 (2016) Comparison of environmental DNA metabarcoding and conventional fish survey  
613 methods in a river system. *Biological Conservation*, **197**, 131–138.
- 614 Simpson, T.J.S., Dias, P.J., Snow, M., Muñoz, J. & Berry, T. (2017) Real-time PCR detection  
615 of *Didemnum perlucidum* (Monniot, 1983) and *Didemnum vexillum* (Kott, 2002) in an  
616 applied routine marine biosecurity context. *Molecular Ecology Resources*, **17**, 443–453.
- 617 Spens, J., Evans, A.R., Halfmaerten, D., Knudsen, S.W., Sengupta, M.E., Mak, S.S.T.,  
618 Sigsgaard, E.E. & Hellström, M. (2016) Comparison of capture and storage methods for  
619 aqueous microbial eDNA using an optimized extraction protocol: advantage of  
620 enclosed filter. *Methods in Ecology and Evolution*, **8**, 635-645.
- 621 Turner, C.R., Barnes, M.A., Xu, C.C.Y., Jones, S.E., Jerde, C.L. & Lodge, D.M. (2014)  
622 Particle size distribution and optimal capture of aqueous microbial eDNA. *Methods in*  
623 *Ecology and Evolution*, **5**, 676–684.
- 624 Turner, C.R., Uy, K.L. & Everhart, R.C. (2015) Fish environmental DNA is more concentrated  
625 in aquatic sediments than surface water. *Biological Conservation*, **183**, 93–102.
- 626 Wangensteen, O.S., Cebrian, E., Palacín, C. & Turon, X. (2018a) Under the canopy:  
627 Community-wide effects of invasive algae in Marine Protected Areas revealed by  
628 metabarcoding. *Marine Pollution Bulletin*, **127**, 54–66.
- 629 Wangensteen, O.S., Palacín, C., Guardiola, M. & Turon, X. (2018b) DNA metabarcoding of  
630 littoral hard-bottom communities: high diversity and database gaps revealed by two  
631 molecular markers. *PeerJ*, **6**, e4705.

- 632 Wood, C.A., Bishop, J.D.D., Rennocks, L. & Crundwell, R. (2016) *RAS 2015 Non-Native*  
633 *Species Rapid Assessment Surveys in English Marinas (E Anglia & W Coast)*. Report  
634 to the Bromley Trust.
- 635 Wood, C.A., Bishop, J.D.D. & Yunnice, A.L.E. (2015a) *RAS 2014 Non-Native Species Rapid*  
636 *Assessment Surveys in English Marinas*. Report to the Bromley Trust.
- 637 Wood, C.A., Bishop, J.D.D. & Yunnice, A.L.E. (2015b) *Comprehensive Reassessment of NNS*  
638 *in Welsh Marinas*. Report to Natural Resources Wales.
- 639 Wood, S.A., Zaiko, A., Richter, I., Inglis, G.J. & Pochon, X. (2017) Development of a real-time  
640 polymerase chain reaction assay for the detection of the invasive Mediterranean  
641 fanworm, *Sabella spallanzanii*, in environmental samples. *Environmental science and*  
642 *pollution research international*, **24**, 17373–17382.
- 643 Worm, B., Barbier, E.B., Beaumont, N., Duffy, J.E., Folke, C., Halpern, ... Watson, R. (2006)  
644 Impacts of biodiversity loss on ocean ecosystem services. *Science*, **314**, 787–790.
- 645 WoRMS Editorial Board. (2018) World Register of Marine Species,  
646 <http://www.marinespecies.org>
- 647 Zhan, A., Hulák, M., Sylvester, F., Huang, X., Adebayo, A.A., Abbott, C.L., ... Macisaac, H.J.  
648 (2013) High sensitivity of 454 pyrosequencing for detection of rare species in aquatic  
649 communities. *Methods in Ecology and Evolution*, **4**, 558–565.
- 650
- 651

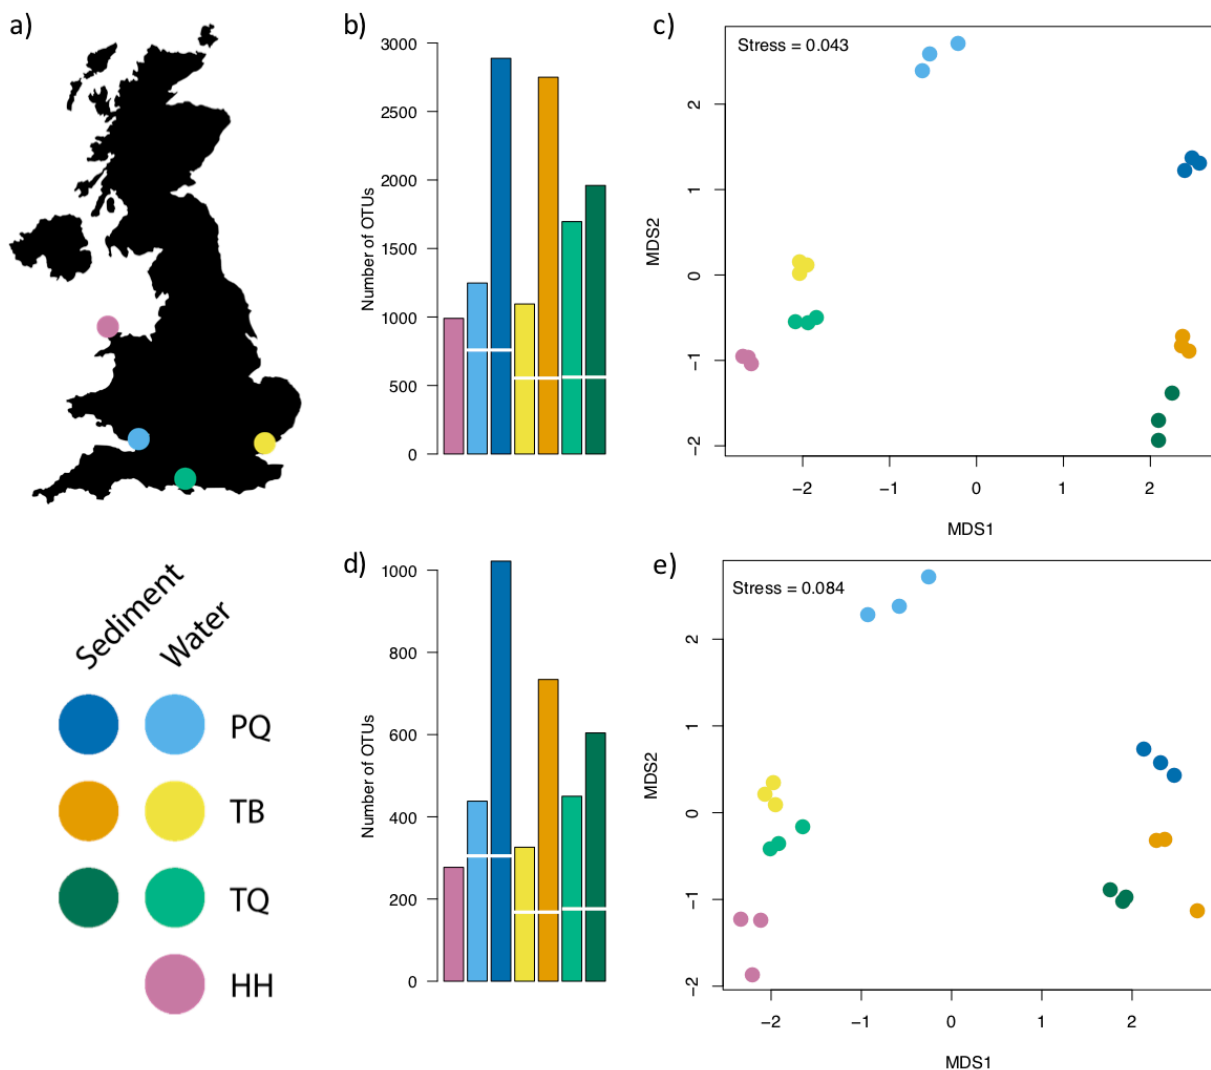

652  
653 **Fig. 1.** a) Map of United Kingdom indicating the geographic position of the sampled sites, a legend is  
654 provided below indicating the four sites (PQ, TB, TQ and HH) and colours for water and sediment eDNA  
655 samples for each site. Barplots detailing number of OTUs detected across sampling sites and eDNA  
656 sample type for COI b) and 18S rRNA d) metabarcoding of UK marinas, the break in bars indicates the  
657 number of shared OTUs between sediment and water eDNA samples. Non-metric multidimensional  
658 scaling ordination plots based on Bray-Curtis dissimilarities between: c) COI and e) 18S rRNA  
659 metabarcoding of marina sediment and water eDNA samples.  
660

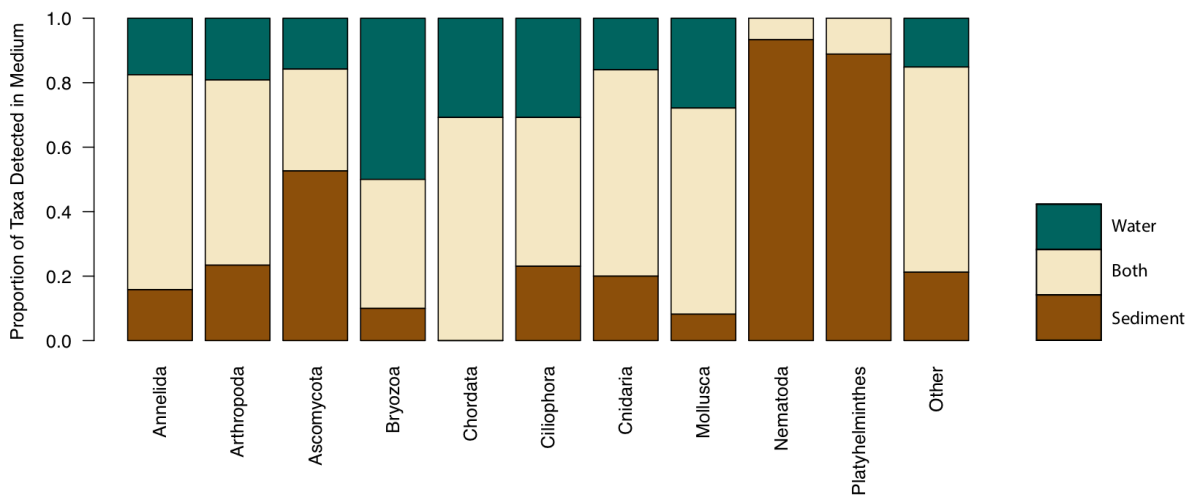

661

662

663 **Fig. 2.** Horizontal stacked bar chart detailing proportion of OTUs detected in eDNA from sediment, water  
664 or both across the top 10 phyla for pooled 18S rRNA and COI metabarcoding of UK marinas.

665

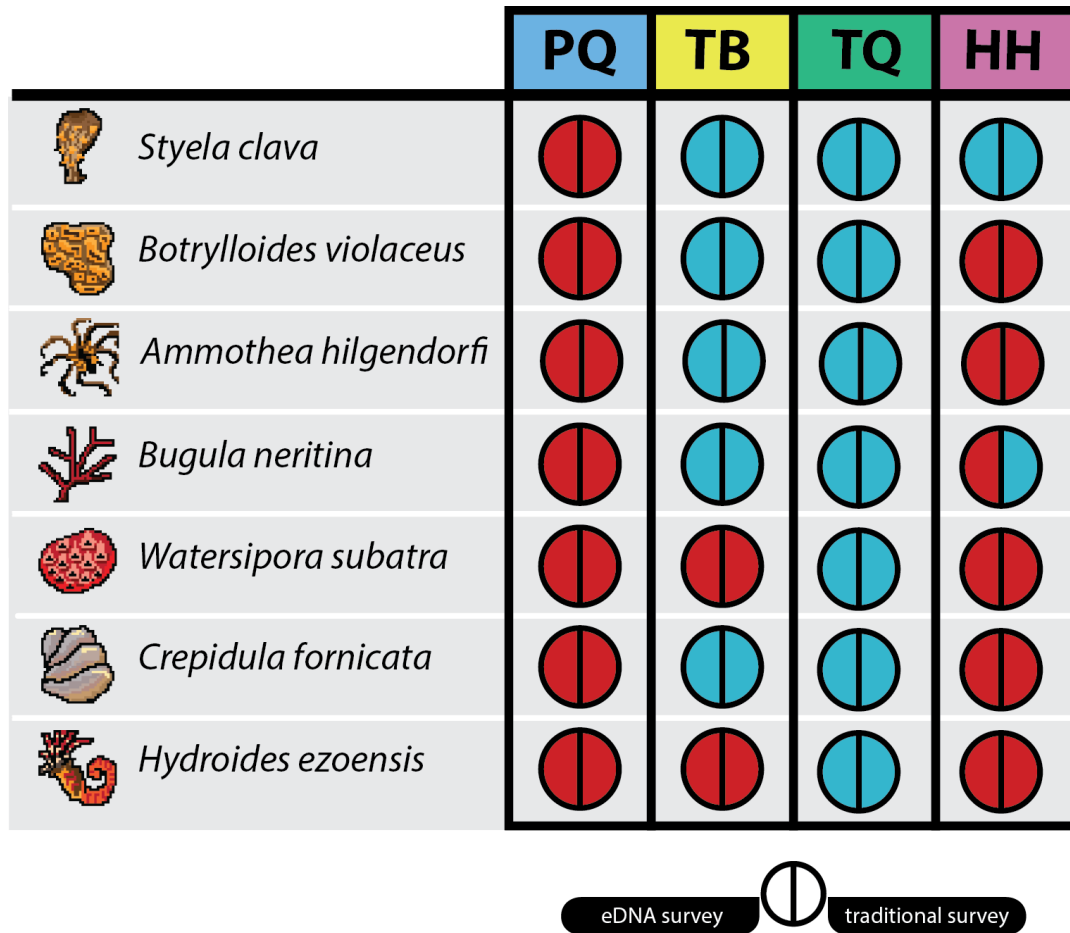

666

667

668

669 **Fig. 3.** Presence absence diagram for seven non-indigenous species across four sampling sites. For each

670 species-location the left semi-circle indicates the detection using eDNA metabarcoding surveys of 18S

671 rRNA and COI fragments, and the right semi-circle indicates the detection from traditional manual

672 surveys. Blue indicates a positive detection for that species-location and red indicates no detection.

673

674

675
