1 **Detection of introduced and resident marine species using environmental DNA**  
2 **metabarcoding of sediment and water**

3

4 Mr. Luke E. Holman<sup>1\*</sup> (ORCID: 0000-0002-8139-3760)

5 Dr. Mark de Bruyn<sup>2,3</sup>

6 Prof. Simon Creer<sup>2</sup>

7 Prof. Gary Carvalho<sup>2</sup>

8 Dr. Julie Robidart<sup>4</sup>

9 Dr. Marc Rius<sup>1,5</sup> (ORCID: 0000-0002-2195-6605)

10

11 <sup>1</sup> School of Ocean and Earth Science, National Oceanography Centre Southampton, University of  
12 Southampton, United Kingdom

13 <sup>2</sup> Molecular Ecology and Fisheries Genetics Laboratory, School of Natural Sciences, Bangor  
14 University, United Kingdom

15 <sup>3</sup> The University of Sydney, School of Life and Environmental Sciences, Australia

16 <sup>4</sup> Ocean Technology and Engineering Group, National Oceanography Centre Southampton,  
17 United Kingdom

18 <sup>5</sup> Centre for Ecological Genomics and Wildlife Conservation, University of Johannesburg, South  
19 Africa

20

21

22 \*Corresponding Author

23 Email: l.e.holman@soton.ac.uk

24

25

26

27

28

29

30

31

32 **Abstract**

33 Environmental DNA (eDNA) surveys are increasingly used for biodiversity monitoring,  
34 providing unprecedented resolution and sensitivity for understanding biological community  
35 composition. These surveys are especially important for monitoring non-indigenous species, for  
36 which early detection and mitigation actions are of critical importance. However, eDNA studies  
37 focussing on the effects that different environmental sample types have on community  
38 composition remain rare. Here we used eDNA metabarcoding of 18S rRNA and COI genes to  
39 unravel community composition and to compare sediment and water samples. We first detected  
40 markedly different communities and a greater number of distinct operational taxonomic in  
41 sediment compared to water. We then compared the obtained datasets with previously published  
42 biodiversity surveys and found excellent concordance among different survey techniques.  
43 Finally, eDNA metabarcoding detected many non-indigenous species including several novel  
44 species introductions. We conclude that careful consideration on the type of environmental  
45 sample is needed when conducting eDNA surveys, especially for assessments of community  
46 change.

47  
48  
49  
50  
51  
52  
53  
54  
55  
56  
57  
58  
59  
60  
61  
62

63

## 64 **Introduction**

65 Anthropogenic activities have widespread impacts on global biodiversity<sup>1,2</sup> and negatively affect  
66 ecosystem services and function<sup>3</sup>. Cumulatively these impacts create an urgent need to develop  
67 monitoring tools that rapidly and accurately detect community composition. Existing biodiversity  
68 survey techniques have been criticised for their lack of methodological standardisation (e.g.  
69 observer bias or taxonomic resolution)<sup>4,5</sup>. One approach that has the potential to overcome some  
70 of these limitations is the use of nucleic acids found in environmental samples, such as water,  
71 soil or sediment, to infer presence or absence of living organisms in the ecosystem<sup>6</sup>. This genetic  
72 material, known as environmental DNA (eDNA), is a poly-disperse mixture of tissue, cells,  
73 subcellular fragments and extracellular DNA lost to the environment through the normal life and  
74 death of organisms<sup>7,8</sup>. Environmental DNA surveys have been used in targeted detection (i.e.  
75 single species) studies with qPCR assays<sup>9-12</sup>, and in community (i.e. multi-species) studies using  
76 metabarcoding<sup>13-15</sup>. These surveys are highly sensitive, and once the methodology is optimised  
77 are amenable to automation<sup>16</sup>. However, validity and replicability rely on appropriate  
78 experimental design and an understanding of the effects of methodological choices during  
79 sampling, sequencing library preparation and bioinformatic analysis<sup>17,18</sup>. Overall, eDNA surveys  
80 are highly informative and can complement other biodiversity monitoring methods<sup>19</sup>.

81 Recent work has identified a vast range of protocols for the collection and extraction of eDNA  
82 from different environmental sample types (e.g. water vs. sediment)<sup>20-22</sup>. Despite this progress,  
83 we are only just beginning to understand how choice of environmental sample type affects  
84 species detectability<sup>23,24</sup>. For example, we would not expect to detect both nektonic and benthic  
85 organisms in a morphological analysis of a sediment core, but several eDNA studies have  
86 detected both of these groups in eDNA isolated from marine sediment<sup>23,25</sup>. Understanding which  
87 marine communities are being profiled with eDNA from different sample types is essential to  
88 place eDNA studies in the context of existing methods.

89 Biodiversity monitoring is normally performed by conducting standardised surveys until  
90 reaching a species discovery asymptote<sup>26,27</sup>. Such surveys often focus on the detection of a  
91 specific group of species that are being targeted, with no ability to retrospectively separate mis-  
92 identified species in light of new species discoveries. This is of critical importance for  
93 biodiversity monitoring in the sea because between 9,000-35,000 marine species (2.7% of the

94 total number of marine species) are considered molecular cryptic<sup>28</sup>, i.e. morphologically similar  
95 but genetically distinct species. Indeed, genetic studies have revealed many widespread marine  
96 species containing multiple cryptic lineages<sup>29,30</sup>. This highlights the need to integrate  
97 morphological and genetic approaches to accurately detect species.

98 Non-indigenous species (NIS) are those that have been transported through human action from  
99 their native range into a novel geographic location. NIS pose a severe threat to anthropogenic  
100 activities, human health and indigenous biodiversity<sup>31-35</sup>. Most marine NIS have spread globally  
101 via vectors such as transoceanic shipping or canals connecting large water bodies<sup>35,36</sup>. At smaller  
102 (10s of km) geographical scales, other vectors such as intraregional boating significantly enhance  
103 the spread of NIS<sup>37</sup>. Along coastal areas, studies have highlighted the importance of monitoring  
104 marinas and harbours<sup>26</sup>, as these are hotspots of NIS and together with marine infrastructure (e.g.  
105 breakwaters, artificial reefs) promote the spread of NIS<sup>38</sup>. In these habitats, NIS often  
106 outcompete native resident species and dominate artificial hard substrata<sup>39,40</sup>. Marinas and  
107 harbours have distinct ecological and physico-chemical conditions compared to the surrounding  
108 marine environment<sup>41,42</sup>. Consequently, specific sampling and surveying protocols are needed to  
109 study marine organisms in these environments.

110 Here we used eDNA metabarcoding to compare alpha and beta diversity between sediment and  
111 water samples collected in marinas and harbours. We then compared the eDNA metabarcoding  
112 results with previously published biodiversity data to identify if NIS detection was comparable  
113 between methods. Subsequently, we parsed our eDNA metabarcoding dataset to identify globally  
114 relevant NIS and a recently introduced NIS in the study region. Finally, we outlined the strengths  
115 and weaknesses of eDNA metabarcoding for the detection of NIS and community composition,  
116 and how this technique can help conservation efforts for both preserving native biodiversity and  
117 mitigating the deleterious effects of NIS.

118

## 119 **Results**

### 120 *Raw sequencing results and OTU generation*

121 Sequencing produced a total of 17.8 million paired end reads, with 15.2 million sequences  
122 remaining after paired end read merging and quality filtering. The average number of sequences  
123 per sample after filtering (excluding those from control samples) was  $200,185 \pm 64,019$  (s.d.).  
124 Negative control samples contained an average of  $811 \pm 3,402$  (s.d.) sequences. One negative

125 control sample contained ~15,000 sequences that mapped to an operational taxonomic unit  
126 (OTU) having 100% identity to a sequence of a terrestrial fungi (Genbank Accession number:  
127 FJ804151.1), excluding this OTU from the entire analysis gives an average of  $51 \pm 94$  (s.d.)  
128 sequences per no-template control sample. Denoising produced 8,069 OTUs for COI and 2,433  
129 for 18S with 6,435 and 1,679 remaining respectively after OTU curation with LULU. Taxonomic  
130 annotation identified 622 OTUs from the 18S rRNA dataset and 481 OTUs from the COI dataset.  
131 Taxonomic data from World Register of Marine Species could be retrieved for 200 of the  
132 annotated COI OTUs and 190 of the 18S OTUs.

133

### 134 *Biodiversity detection*

135 The effects of preservation techniques for water eDNA samples differed between the target  
136 amplicons. The 18S rRNA amplicon produced significantly more OTUs (Wilcoxon signed-rank  
137 test,  $p < 0.05$ ) in samples preserved by freezing compared to Longmire's preservation method,  
138 while no significant differences (Wilcoxon signed-rank test,  $p = 0.55$ ) between preservation  
139 treatments were observed for the COI amplicon (see Supplementary Information 2 for details).  
140 As a conservative approach all subsequent analyses used sample data from the frozen samples.  
141 The minimum number of reads per sample was 137,624 and 117,915 for the COI and 18S  
142 datasets, respectively, and so samples were rarefied to these numbers of reads. A consistently  
143 greater number of OTUs were detected in the sediment samples compared to the water samples  
144 across all sites and both markers as shown in Figure 1b,d. In all cases, unique OTUs were  
145 detected in both water and sediment samples, but the mean proportion of unique OTUs across  
146 18S and COI detected in water was lower (49.2%) than in sediment (73.8%). A 2-way ANOVA  
147 testing the effects of sample type, site and their interaction on the number of OTUs indicated a  
148 significant effect of the site-sample type interaction ( $p < 0.001$ ) for both 18S and COI (See  
149 Supplementary Information 3 for full model output). Ordination plots based on the Bray-Curtis  
150 dissimilarities (Fig. 1c,e) showed that OTUs found in sediment and water eDNA differed in  
151 community structure as much as among sites. Additionally, the PERMANOVA model indicated  
152 significant differences ( $p < 0.001$ ) among sites and eDNA sample types in both the 18S and COI  
153 datasets (See Supplementary Information 4 for full model output). Accordingly, eDNA sample  
154 type in the PERMANOVA model explained 23.2% and 32.5% of the variation in the 18S and  
155 COI data respectively, while site explained 34.2% and 30.5% in the COI and 18S data. At

156 phylum level (Fig. 2), taxonomy did not predict the sample type of detections. However, an exact  
157 binomial goodness of fit test showed non-random detection proportions only in the Nematoda  
158 and Platyhelminthes ( $p < 0.001$  and  $p = 0.038$  respectively), with eDNA detections mostly in  
159 sediment in both cases.

160

### 161 *Detection of non-indigenous species*

162 As the 18S region lacks the appropriate resolution for taxonomic assignments at species level<sup>43,44</sup>  
163 only the taxonomic assignments from the COI were considered for the identification of NIS. In  
164 total 18 NIS to the study region and 24 species documented as NIS in other regions were detected  
165 across the four sites (see Supplementary Table 2 for full list). Out of the detected NIS, eight were  
166 present in the list of 21 NIS previously detected in rapid assessment (RA) non-native invertebrate  
167 surveys at the sampling sites. As shown in Fig. 3, the results of the eDNA surveys closely  
168 matched those of the RA surveys. Four detections differed from the RA surveys, a single eDNA  
169 detection not seen in RA and three RA detections not seen in eDNA surveys (Fig. 3). Remapping  
170 of raw reads from sites with incongruent detections to respective COI regions (Genbank  
171 Accessions: *Austrominius modestus* KY607884; *Bugula neritina* KY235450; *Ficopomatus*  
172 *enigmatus* KX840011) found hits for the bryozoan *B. neritina* only (five reads from a single  
173 replicate). These reads were lost during data filtering and so did not feature in the final dataset.  
174 Three species detections in site TQ represented novel introductions: the detection of *Arcuatula*  
175 *senhousia* (Asian date mussel), the nemertean *Cephalothrix simula* and the oligochaete *Paranais*  
176 *frici*. Targeted visual surveys on tidal mudflats within two kilometres of Marina TQ confirmed  
177 the presence of live *A. senhousia* individuals. Furthermore, we generated COI sequences from  
178 tissue samples of these individuals (Genbank Accession: MH924820 and MH924821) and these  
179 provided full length, high identity matches to both known *A. senhousia* DNA sequences and our  
180 eDNA derived OTU sequence (see Supplementary Information 5 for details of DNA barcoding).

181

## 182 **Discussion**

183 We demonstrated that the type of environmental sample in eDNA metabarcoding studies affects  
184 the measured community composition, suggesting that the most comprehensive assessment of  
185 biodiversity in a given community comes from the collection of multiple environmental sample  
186 types. We found concordance between our eDNA metabarcoding data and previous biodiversity

187 surveys, demonstrating the value of implementing existing methods alongside eDNA surveys.  
188 Furthermore, we detected novel species introductions, corroborating the idea that eDNA  
189 metabarcoding is an effective tool for early detection of NIS. This is key for increasing the  
190 likelihood of successful control and eventual eradication of NIS. Our study demonstrates that  
191 type of environmental sample can affect the detection of both whole community composition and  
192 particular species of concern.

193 Our study showed that at the level of phylum, detection was not significantly different between  
194 sediment and water for most taxa. Similarly, we showed that for most NIS both water or  
195 sediment samples served as an excellent sample type for detection, and taxonomic assignments at  
196 the level of phylum did not predict if a species was detected in water, sediment or both  
197 environmental sample types (except in Nematodes and Platyhelminthes, whose members are  
198 predominantly benthic inhabitants). However, all sampled sites showed higher OTU richness in  
199 sediment compared to water, which suggests a clear difference in species richness. The  
200 magnitude of this difference was not fixed across sites, with a significant interaction term in our  
201 2-way ANOVA indicating that the detected OTU richness differences between sediment and  
202 water vary spatially. The majority of research using eDNA to detect aquatic macrofauna has  
203 focused on the collection of water samples, while sediment samples have received comparatively  
204 less attention (see Supplementary Fig. 1 from Koziol, et al.<sup>23</sup>). This is surprising considering that  
205 sediment samples typically contain three orders of magnitude more eDNA than water<sup>45</sup>. Despite  
206 our observations that sediment provided a greater number of OTU richness than water samples,  
207 we do not advocate for a particular sample type, as this decision should be driven by the target  
208 organisms for a given study. For example, a researcher hoping to use eDNA metabarcoding to  
209 measure Nematode diversity, based on our results, should sample marine sediment. Regarding  
210 NIS, as they are not a particular taxonomic group and as our results did not find clear differences  
211 in detection between sample types, we suggest that no specific sample type offers superior  
212 detection of these species. We argue that at lower taxonomic level the species-specific ecology of  
213 eDNA (*sensu* Barnes and Turner<sup>46</sup>) leads to a convergent eDNA occupancy in different  
214 environmental sample types. Further work is needed to clarify how eDNA partitions into  
215 adjacent environmental samples across the tree of life.

216 Current eDNA metabarcoding research has identified large variation in the detected marine  
217 biodiversity across small spatial scales (100s of metres) in both sediment<sup>47</sup> and water<sup>48,49</sup>.



218 Additionally fractionation of environmental samples (i.e. sorting samples by particle size class)  
219 can produce significant differences in the metabarcoding results between fractions<sup>50,51</sup> indicating  
220 significant variation can be found within sites. We found similar patterns, with PERMANOVA  
221 modelling indicating that site and environmental sample type containing approximately  
222 equivalent variation in OTU dissimilarity. Future research should explore how different sample  
223 types and eDNA extraction methods affect the detection of biodiversity, especially as eDNA  
224 metabarcoding moves from an experimental technique to a routine monitoring tool<sup>52,53</sup>. A key  
225 gap in our understanding is the rate at which eDNA degrades in sediment and how this affects  
226 our observations. In lake sediments, eDNA can be preserved for thousands of years<sup>54,55</sup>, with  
227 eDNA being preserved along with deposited sediments so each core represents a timeline  
228 through which past biological community communities can be examined<sup>56</sup>. Here we chose to  
229 process only the uppermost section of the sampled cores, with the aim of profiling contemporary  
230 diversity. Studies are needed to advance our understanding of how eDNA deposits and degrades  
231 in marine sediments, so eDNA studies can be placed in a temporal context.

232 We found that eDNA metabarcoding of water samples accurately detects many NIS species, as  
233 seen in previous studies<sup>13-15</sup>. By comparing our eDNA data to those collected using existing  
234 methods we found close congruence in NIS incidence. The false-negative eDNA detection of *B.*  
235 *neritina* was found to be a result of setting specific bioinformatic parameters, showing that  
236 choices made during sequence processing can have an effect on the detectability of species in  
237 eDNA samples. Indeed, this has previously been shown in metabarcoding of bulk tissue  
238 samples<sup>57</sup> and work is urgently needed to determine the effects of bioinformatic parameters,  
239 variable primer binding sites and the choice of reference databases on the detection of NIS from  
240 eDNA samples. The remaining incongruent detections may be a result of community turnover  
241 among the survey dates or phenological changes affecting species distributions. Indeed marine  
242 coastal communities have been shown to shift in community composition across seasons and  
243 reproductive cycles<sup>58,59</sup>. It is therefore recommended to perform replicated eDNA metabarcoding  
244 surveys over time to enhance existing monitoring programmes wherever possible. In this study  
245 we identified several recently introduced NIS in the United Kingdom and confirmed the eDNA  
246 detection with targeted local surveys for one NIS. The case of *A. senhousia* is particularly  
247 relevant as it is spreading globally<sup>60</sup> and has the potential to dramatically alter benthic  
248 biodiversity when invasive<sup>61,62</sup>. This species produces a cocoon of byssus thread that at high



249 densities (>1,500 individuals/m<sup>2</sup>) interlinks between individuals to form a continuous byssal mat  
250 which displaces local eelgrass and native bivalves<sup>63,64</sup>. Recent field surveys along the south coast  
251 of the United Kingdom have independently confirmed the presence of both *A. senhousia*<sup>65</sup> and *C.*  
252 *simula*<sup>66</sup>. These results confirm the accuracy of eDNA surveys presented here and highlight the  
253 benefits of implementing molecular technologies into routine monitoring programmes. As the  
254 cost of sequencing decreases and methods improve for high throughput eDNA extraction and  
255 metabarcoding library preparation<sup>67</sup>, natural resource managers and researchers will have access  
256 to much greater resolution data at a fraction of the cost and time of current monitoring surveys.  
257 NIS may be missed in surveys based solely on eDNA (e.g. Wood, et al. <sup>68</sup>), and eDNA  
258 metabarcoding may detect rare species that are often missed using other methods<sup>69</sup>. Detection of  
259 NIS could be further facilitated through autonomous sampling and eDNA surveys<sup>16</sup> to provide  
260 live NIS data in introduction hotspots, such as ports or marinas. Additionally combining these  
261 techniques with eDNA biobanking<sup>70</sup> could provide an eDNA reference database for specific  
262 geographical regions of high biosecurity risk, providing an invaluable resource for biodiversity  
263 managers and researchers to examine the process of invasion through time. Taken together, our  
264 study shows eDNA metabarcoding to be an effective tool for the detection and identification of  
265 both native and NIS from different marine environments.

266

## 267 **Methods**

### 268 *Study sites*

269 Four marinas were selected from around the United Kingdom (Fig. 1a) to represent variation in  
270 modelled invasion potential<sup>71</sup>, presence of NIS<sup>72</sup> and benthic habitat type<sup>73</sup>. All chosen marinas  
271 have been surveyed previously, so there is a good understanding of the species found in these  
272 sites<sup>74-76</sup>. Marina access was contingent on anonymity and so marina names and exact locations  
273 are not provided, with Fig. 1a showing approximate locations only. Marina *TQ* is an open marina  
274 subject to tides and varying salinity, marina *PQ* is a loch marina open during high tide, and  
275 marinas *TB* and *HH* are permanently open to the North and Celtic Sea respectively.

276

### 277 *Environmental DNA sampling*

278 Surveys were conducted during May 2017 and 24 sampling points were randomly selected within  
279 each site (as shown in Supplementary Information 6). At each point 50ml of water was collected

280 from 10cm below the surface using a sterile 60ml Luer lock syringe and filtered through a  
281 0.22 $\mu$ m polyethersulfone Sterivex filter (Merck Millipore, Massachusetts USA). After collecting  
282 seawater from eight locations (400ml total volume) the filter was changed, resulting in a total of  
283 three filters per site. Pooling of water samples was performed to provide three filter replicates per  
284 site that represented the heterogeneity of eDNA in the marina. In order to test the effect of  
285 different sample preservation methods, water samples were collected in duplicate in each  
286 sampling point. One set of three filters had ~1.5ml sterile Longmire's solution (100mM  
287 Tris, 10mM EDTA, 10mM NaCl, 0.5% SDS) applied in the inlet valve<sup>77</sup>. The second set of three  
288 filters was kept on ice for no longer than eight hours before being frozen at -20°C. In addition to  
289 the water samples, a subtidal sediment sample was collected at the first water sampling point and  
290 then after every three water samples, accounting for a total of nine sediment samples per site. We  
291 used a UWITEC Corer (UWITEC, Mondsee, Austria) to collect a sediment core of 600mm high  
292 and 60mm diameter. We then used a sterile disposable spatula to collect a subsample of 10-20g  
293 of sediment from the top 2cm of the core, avoiding sediment collection from the sides of the  
294 core. The subsamples were stored in sterile plastic bags and kept on ice for no longer than eight  
295 hours before being frozen at -80°C. Due to a malfunction of the corer, no sediment sample was  
296 collected in Site HH. Disposable gloves were changed after collection of each sample. All reused  
297 equipment was soaked in 10% bleach and rinsed in DNase-free sterile water between sites.

298  
299 *eDNA extraction*  
300 DNA extractions were performed in a PCR-free clean room, separate from main laboratory  
301 facilities. No high copy templates, cultures or amplicons were permitted in this clean laboratory.  
302 DNA extractions from water samples followed the SX<sub>CAPSULE</sub> method by Spens, et al.<sup>21</sup>. Briefly,  
303 preservative solution was removed from the outlet and filters were dried at room temperature for  
304 two hours. We then added 720 $\mu$ l Qiagen buffer ATL (Qiagen, Hilden, Germany) and 80 $\mu$ l  
305 Proteinase K to the filter and all samples were digested overnight at 56°C. After digestion,  
306 samples were processed using the Qiagen DNeasy Blood and Tissue Kit as per manufacturer  
307 instructions, with a final elution of 200 $\mu$ l PCR grade water.  
308 Sediment extractions were conducted using the Qiagen DNeasy Powermax Soil Kit following the  
309 manufacturer's protocol. The nine samples collected in each site were randomly mixed to form

310 three pooled samples; 10g of pooled sample was processed for the extraction. A total of ten  
311 samples were processed, three from each site with a single extraction control.

312

### 313 *Inhibition testing*

314 To ensure extracted DNA was free of PCR inhibitors, a Primer Design Real-Time PCR Internal  
315 Control Kit (PrimerDesign, Southampton, UK) was used. We performed qPCR reactions on each  
316 extracted DNA sample following the manufacturer's protocol with 12.5µl reaction volumes. A  
317 positive detection of inhibition due to co-purified compounds from DNA extraction protocols  
318 would produce an increase in cycle threshold number in comparison to no template controls. All  
319 samples were successfully processed and no samples showed indication of PCR inhibition.

320

### 321 *Primer selection and library preparation*

322 Two sets of primers were chosen for metabarcoding the environmental samples: a 313bp section  
323 of the standard DNA barcoding region of the cytochrome c oxidase subunit I gene (COI) using  
324 primers described in Leray, et al. <sup>78</sup>; and a variable length target of the hypervariable V4 region  
325 of the nuclear small subunit ribosomal DNA (18S) using primers from Zhan, et al. <sup>79</sup>. These two  
326 primer sets allow for broad characterisation of marine metazoan diversity. Sequencing libraries  
327 were prepared using a 2-step PCR approach as detailed in Bista, et al. <sup>80</sup>. Briefly, this method  
328 first amplifies the target region in PCR 1 annealing universal adapters, and then sample specific  
329 indices and sequencing primers are annealed in PCR 2. In contrast to Bista, et al. <sup>80</sup> we used  
330 unique dual-matched indexes for PCR 2 to avoid index crosstalk associated with combinatorial  
331 indexing<sup>81</sup>. PCR 1 was prepared in a PCR-free room separate from main laboratory facilities.  
332 PCR 1 reactions were conducted in 20µl volumes containing 10µl Amplitaq GOLD 360 2X  
333 Mastermix (Applied Biosystems, California, USA), 0.8µl (5 nmol ml<sup>-1</sup>) of each forward and  
334 reverse primer and 2µl of undiluted environmental DNA extract. The reaction conditions for PCR  
335 were an initial denaturation step at 95°C for 10 minutes followed by 20 cycles of 95°C for 0:30,  
336 variable annealing temp (46°C for COI and 50°C for 18S) for 0:30, and extension at 72°C for  
337 1:00. A final extension at 72°C was performed for 10 minutes. The PCR product was cleaned  
338 using AMPure XP beads (Beckman Coulter, California, USA) at a 0.8 beads:sample ratio  
339 following manufacturer's instructions. PCR 2 reactions were conducted in 20µl volumes  
340 containing 10µl Amplitaq GOLD 360 2X Mastermix, 0.5µl (10 nmol ml<sup>-1</sup>) of both forward and

341 reverse primers and 5µl of undiluted cleaned PCR1 product. PCR conditions were an initial  
342 denaturation step at 95°C for 10 minutes followed by 15 cycles of 95°C for 0:30, annealing at  
343 55°C for 0:30, and extension at 72°C for 1:00. A final extension at 72°C was performed for 10  
344 minutes. PCR 2 products were cleaned using AMPure XP beads as above and normalised  
345 according to their fluorescence using the Qubit HS Assay Kit (ThermoFisher Scientific,  
346 Massachusetts, USA). These normalised samples were pooled at an equimolar concentration and  
347 then quantified as per manufacturer's instructions using the NEBNext Library Quant qPCR kit  
348 (New England Biolabs, Massachusetts, USA).

349 Blank filters, DNA extraction kits and positive controls were collected, extracted and sequenced  
350 identically to non-control samples (detailed in Supplementary Information 1). Negative controls  
351 cannot be meaningfully normalized and thus they were added to the pooled libraries without  
352 dilution. The final library was sequenced using an Illumina MiSeq instrument (Illumina, San  
353 Diego, USA) with a V3 2 x 300bp kit.

354  
355 *Bioinformatic analyses*

356 Samples were demultiplexed using the Illumina MiSeq control software (v.2.6.2.1). The  
357 demultiplexed data was analysed using a custom pipeline written in the R programming  
358 language<sup>82</sup> (hosted at <https://github.com/leholman/metabarTOAD>). The steps are as follows.  
359 Forward and reverse paired end reads were merged using the -fastq\_mergepairs option of  
360 USEARCH v.10.0.240<sup>83</sup> with maximum difference of 15, percent identity of 80% and quality  
361 filter set at maximum expected errors of 1. Both the forward and reverse primer sequences were  
362 matched using Cutadapt v.1.16<sup>84</sup> and only sequences containing both primer regions were  
363 retained. Sequences were discarded if they were outside of a defined length boundary (303-  
364 323bp for COI, 375-450bp for 18S) using Cutadapt. Sequences were then pooled, singletons  
365 were discarded and sequences were quality filtered with a maximum expected error of 1 using  
366 the -fastq\_filter option of vsearch v.2.4.3<sup>85</sup>. Sequences were then denoised and chimeras filtered  
367 using the unoise3 algorithm implemented in USEARCH. The resultant operational taxonomic  
368 units (OTUs) were curated using the LULU package v.0.1.0<sup>86</sup>. An OTU by sample table was  
369 produced by mapping the merged and trimmed reads against the curated OTUs using  
370 USEARCH, with the raw query read assigned to the OTU with the best match (highest bit score)  
371 within 97% identity. The OTU x sample table was filtered in R as follows. To minimise the

372 chance of spurious OTUs being included in the final dataset any record with less than 3 raw reads  
373 were changed to zero and any OTU that did not appear in more than one sample was removed  
374 from the analysis. OTUs found in negative controls were removed from the analysis.

375

### 376 *Taxonomic assignment*

377 Assigning correct taxonomy to an unknown set of DNA sequences can be challenging as  
378 reference databases are incomplete, contain errors and the taxonomy of some marine groups is  
379 uncertain. With such limitations in mind, we assigned taxonomy using a BLAST v.2.6.0+  
380 search<sup>87</sup> returning the single best hit (largest bit score) from databases within 97% of the query  
381 using a custom R script to parse the raw blast results. In the case of multiple sequences attaining  
382 equal bit scores for a given OTU an assignment was only made if all reference sequences  
383 belonged to the same species. The MIDORI database (UNIQUE\_20180221)<sup>88</sup> was used for the  
384 COI data and the SILVA database (SSU r132, subset to contain only Eukaryotes)<sup>89</sup> was used for  
385 the 18S rRNA data. The match taxa tool from the World Register of Marine Species<sup>90</sup> was used  
386 to filter the data to include only marine species and check the taxonomic classification. The  
387 World Register of Introduced Marine Species<sup>91</sup> contains data on the introduced status of a large  
388 number of species, we used the online match taxa tool to determine the non-indigenous status of  
389 annotations that could be assigned taxonomy from the World Register of Marine Species.

390

### 391 *Statistical analyses*

392 All statistical analyses were conducted in R v.3.5.0. The Vegan R package v.2.5.2<sup>92</sup> was used to  
393 rarefy samples to the minimum sample read depth for each amplicon. The number of OTUs per  
394 site/condition was calculated as the number of OTUs with a non-zero number of normalized  
395 reads after summing the reads across all three site level replicates. To test if there was a  
396 significant difference between the number of OTUs generated by sediment and water eDNA,  
397 individual non-summed replicate sample data was used to build a two-way ANOVA model with  
398 the formula *number\_of\_OTUs~sedimentorwater\*site* implemented in R using the function *aov()*.  
399 Non-metric multidimensional scaling ordination plots were generated from Bray-Curtis  
400 dissimilarity values derived using Vegan. A Permutation Analysis of Variance  
401 (PERMANOVA)<sup>93</sup> was performed using the Bray Curtis dissimilarity following the model  
402 *dissimilarity\_matrix~sedimentorwater\*site* implemented in R using the function *adonis* from the

403 *vegan* package. OTUs with taxonomic assignment were separated into those found in sediment,  
404 water or both media and the OTUs were then collapsed at the Phylum level to explore taxonomic  
405 patterns of detection in water or sediment. Phyla with less than eight OTUs were combined and  
406 represented under category named “other”. To test for non-random counts of species detection  
407 between water and sediment within taxa an exact binomial test was performed between counts of  
408 species detected in water and sediment. The number of species detected in both water and  
409 sediment were halved and the value added to the counts for each sample type with non-integer  
410 values conservatively rounded down to the nearest whole number. A correction for multiple  
411 comparisons<sup>94</sup> was applied across the p values from the exact binomial tests generated by the R  
412 function `binom.test()`. Records from manual surveys previously conducted for non-native  
413 invertebrates at the sample sites<sup>74-76</sup> were compared with the detected species from  
414 metabarcoding data.

415

## 416 **References**

- 417 1 Sala, E. & Knowlton, N. Global marine biodiversity trends. *Annu Rev Env Resour* **31**, 93-  
418 122, doi:10.1146/annurev.energy.31.020105.100235 (2006).
- 419 2 Butchart, S. H. M. *et al.* Global biodiversity: indicators of recent declines. *Science* **328**,  
420 1164-1168, doi:10.1126/science.1187512 (2010).
- 421 3 Worm, B. *et al.* Impacts of biodiversity loss on ocean ecosystem services. *Science* **314**,  
422 787-790, doi:10.1126/science.1132294 (2006).
- 423 4 Oliver, I. & Beattie, A. J. A possible method for the rapid assessment of biodiversity.  
424 *Conservation Biology* **7**, 562-568, doi:DOI 10.1046/j.1523-1739.1993.07030562.x  
425 (1993).
- 426 5 Fitzpatrick, M. C., Preisser, E. L., Ellison, A. M. & Elkinton, J. S. Observer bias and the  
427 detection of low-density populations. *Ecological Applications* **19**, 1673-1679 (2009).
- 428 6 Thomsen, P. F. & Willerslev, E. Environmental DNA - an emerging tool in conservation  
429 for monitoring past and present biodiversity. *Biological Conservation* **183**, 4-18,  
430 doi:10.1016/j.biocon.2014.11.019 (2015).
- 431 7 Turner, C. R. *et al.* Particle size distribution and optimal capture of aqueous microbial  
432 eDNA. *Methods in Ecology and Evolution* **5**, 676-684, doi:10.1111/2041-210x.12206  
433 (2014).



- 434 8 Sassoubre, L. M., Yamahara, K. M., Gardner, L. D., Block, B. A. & Boehm, A. B.  
435 Quantification of environmental DNA (eDNA) shedding and decay rates for three marine  
436 fish. *Environmental Science & Technology* **50**, 10456-10464,  
437 doi:10.1021/acs.est.6b03114 (2016).
- 438 9 Dougherty, M. M. *et al.* Environmental DNA (eDNA) detects the invasive rusty crayfish  
439 *Orconectes rusticus* at low abundances. *Journal of Applied Ecology* **53**, 722-732,  
440 doi:10.1111/1365-2664.12621 (2016).
- 441 10 Simpson, T. J. S., Dias, P. J., Snow, M., Muñoz, J. & Berry, T. Real-time PCR detection  
442 of *Didemnum perlucidum* (Monniot, 1983) and *Didemnum vexillum* (Kott, 2002) in an  
443 applied routine marine biosecurity context. *Molecular Ecology Resources* **17**, 443-453,  
444 doi:10.1111/1755-0998.12581 (2017).
- 445 11 Wood, S. A., Zaiko, A., Richter, I., Inglis, G. J. & Pochon, X. Development of a real-time  
446 polymerase chain reaction assay for the detection of the invasive Mediterranean fanworm,  
447 *Sabella spallanzanii*, in environmental samples. *Environmental Science and Pollution*  
448 *Research* **24**, 17373-17382, doi:10.1007/s11356-017-9357-y (2017).
- 449 12 Kim, P., Kim, D., Yoon, T. J. & Shin, S. Early detection of marine invasive species,  
450 *Bugula neritina* (Bryozoa: Cheilostomatida), using species-specific primers and  
451 environmental DNA analysis in Korea. *Marine Environmental Research* **139**, 1-10,  
452 doi:10.1016/j.marenvres.2018.04.015 (2018).
- 453 13 Borrell, Y. J., Miralles, L., Do Huu, H., Mohammed-Geba, K. & Garcia-Vazquez, E.  
454 DNA in a bottle-rapid metabarcoding survey for early alerts of invasive species in ports.  
455 *PLoS One* **12**, e0183347, doi:10.1371/journal.pone.0183347 (2017).
- 456 14 Lacoursiere-Roussel, A. *et al.* eDNA metabarcoding as a new surveillance approach for  
457 coastal Arctic biodiversity. *Ecology and Evolution* **8**, 7763-7777, doi:10.1002/ece3.4213  
458 (2018).
- 459 15 Grey, E. K. *et al.* Effects of sampling effort on biodiversity patterns estimated from  
460 environmental DNA metabarcoding surveys. *Scientific Reports* **8**, 8843,  
461 doi:10.1038/s41598-018-27048-2 (2018).
- 462 16 McQuillan, J. S. & Robidart, J. C. Molecular-biological sensing in aquatic environments:  
463 recent developments and emerging capabilities. *Current Opinion in Biotechnology* **45**,  
464 43-50, doi:10.1016/j.copbio.2016.11.022 (2017).



- 465 17 Goldberg, C. S. *et al.* Critical considerations for the application of environmental DNA  
466 methods to detect aquatic species. *Methods in Ecology and Evolution* **7**, 1299-1307,  
467 doi:10.1111/2041-210x.12595 (2016).
- 468 18 Alberdi, A., Aizpurua, O., Gilbert, M. T. P. & Bohmann, K. Scrutinizing key steps for  
469 reliable metabarcoding of environmental samples. *Methods in Ecology and Evolution* **9**,  
470 134-147, doi:10.1111/2041-210x.12849 (2018).
- 471 19 Deiner, K. *et al.* Environmental DNA metabarcoding: Transforming how we survey  
472 animal and plant communities. *Molecular Ecology* **26**, 5872-5895,  
473 doi:10.1111/mec.14350 (2017).
- 474 20 Deiner, K. *et al.* Optimising the detection of marine taxonomic richness using  
475 environmental DNA metabarcoding: the effects of filter material, pore size and extraction  
476 method. *Metabarcoding and Metagenomics* **2**, doi:10.3897/mbmg.2.28963 (2018).
- 477 21 Spens, J. *et al.* Comparison of capture and storage methods for aqueous microbial eDNA  
478 using an optimized extraction protocol: advantage of enclosed filter. *Methods in Ecology*  
479 *and Evolution* **8**, 635-645, doi:10.1111/2041-210x.12683 (2017).
- 480 22 Sellers, G. S., Di Muri, C., Gómez, A. & Hänfling, B. Mu-DNA: a modular universal  
481 DNA extraction method adaptable for a wide range of sample types. *Metabarcoding and*  
482 *Metagenomics* **2**, e24556, doi:10.17504/protocols.io.qn9dvh6) (2018).
- 483 23 Koziol, A. *et al.* Environmental DNA metabarcoding studies are critically affected by  
484 substrate selection. *Molecular Ecology Resources* **19**, 366-376, doi:10.1111/1755-  
485 0998.12971 (2019).
- 486 24 Hermans, S. M., Buckley, H. L. & Lear, G. Optimal extraction methods for the  
487 simultaneous analysis of DNA from diverse organisms and sample types. *Molecular*  
488 *Ecology Resources* **18**, 557-569, doi:10.1111/1755-0998.12762 (2018).
- 489 25 Shaw, J. L. A. *et al.* Comparison of environmental DNA metabarcoding and conventional  
490 fish survey methods in a river system. *Biological Conservation* **197**, 131-138,  
491 doi:10.1016/j.biocon.2016.03.010 (2016).
- 492 26 Ashton, G., Books, K., Shucksmith, R. & Cook, E. Rapid assessment of the distribution  
493 of marine non-native species in marinas in Scotland. *Aquatic Invasions* **1**, 209-213  
494 (2006).

- 495 27 Bishop, J. D., Wood, C. A., Leveque, L., Yunnice, A. L. & Viard, F. Repeated rapid  
496 assessment surveys reveal contrasting trends in occupancy of marinas by non-indigenous  
497 species on opposite sides of the western English Channel. *Marine Pollution Bulletin* **95**,  
498 699-706, doi:10.1016/j.marpolbul.2014.11.043 (2015).
- 499 28 Appeltans, W. *et al.* The magnitude of global marine species diversity. *Current Biology*  
500 **22**, 2189-2202, doi:10.1016/j.cub.2012.09.036 (2012).
- 501 29 Pérez-Portela, R., Arranz, V., Rius, M. & Turon, X. Cryptic speciation or global spread?  
502 The case of a cosmopolitan marine invertebrate with limited dispersal capabilities.  
503 *Scientific Reports* **3**, 3197, doi:10.1038/srep03197. (2013).
- 504 30 Rius, M. *et al.* Ecological dominance along rocky shores, with a focus on intertidal  
505 ascidians. *Oceanography and Marine Biology: An Annual Review* **55**, 55-85 (2017).
- 506 31 Bax, N., Williamson, A., Agüero, M., Gonzalez, E. & Geeves, W. Marine invasive alien  
507 species: a threat to global biodiversity. *Marine Policy* **27**, 313-323, doi:10.1016/S0308-  
508 597x(03)00041-1 (2003).
- 509 32 Lovell, S., Stone, S. & Fernandez, L. The Economic Impacts of Aquatic Invasive Species:  
510 A Review of the Literature. *Agricultural and Resource Economics Review* **35**, 195-208,  
511 doi:10.1017/S1068280500010157 (2006).
- 512 33 Ricciardi, A., Hoopes, M. F., Marchetti, M. P. & Lockwood, J. L. Progress toward  
513 understanding the ecological impacts of nonnative species. *Ecological Monographs* **83**,  
514 263-282, doi:10.1890/13-0183.1 (2013).
- 515 34 Mazza, G., Tricarico, E., Genovesi, P. & Gherardi, F. Biological invaders are threats to  
516 human health: an overview. *Ethology Ecology & Evolution* **26**, 112-129,  
517 doi:10.1080/03949370.2013.863225 (2014).
- 518 35 Molnar, J. L., Gamboa, R. L., Revenga, C. & Spalding, M. D. Assessing the global threat  
519 of invasive species to marine biodiversity. *Frontiers in Ecology and the Environment* **6**,  
520 485-492, doi:10.1890/070064 (2008).
- 521 36 Nunes, A. L., Katsanevakis, S., Zenetos, A. & Cardoso, A. C. Gateways to alien  
522 invasions in the European seas. *Aquatic Invasions* **9**, 133-144, doi:10.3391/ai.2014.9.2.02  
523 (2014).

- 524 37 Murray, C. C., Pakhomov, E. A. & Therriault, T. W. Recreational boating: a large  
525 unregulated vector transporting marine invasive species. *Diversity and Distributions* **17**,  
526 1161-1172, doi:10.1111/j.1472-4642.2011.00798.x (2011).
- 527 38 Airoidi, L., Turon, X., Perkol-Finkel, S. & Rius, M. Corridors for aliens but not for  
528 natives: effects of marine urban sprawl at a regional scale. *Diversity and Distributions* **21**,  
529 755-768, doi:10.1111/ddi.12301 (2015).
- 530 39 Glasby, T. M., Connell, S. D., Holloway, M. G. & Hewitt, C. L. Nonindigenous biota on  
531 artificial structures: could habitat creation facilitate biological invasions? *Marine Biology*  
532 **151**, 887-895, doi:10.1007/s00227-006-0552-5 (2006).
- 533 40 Dafforn, K. A., Johnston, E. L. & Glasby, T. M. Shallow moving structures promote  
534 marine invader dominance. *Biofouling* **25**, 277-287, doi:10.1080/08927010802710618  
535 (2009).
- 536 41 Rivero, N. K., Dafforn, K. A., Coleman, M. A. & Johnston, E. L. Environmental and  
537 ecological changes associated with a marina. *Biofouling* **29**, 803-815,  
538 doi:10.1080/08927014.2013.805751 (2013).
- 539 42 Foster, V., Giesler, R. J., Wilson, A. M. W., Nall, C. R. & Cook, E. J. Identifying the  
540 physical features of marina infrastructure associated with the presence of non-native  
541 species in the UK. *Marine Biology* **163**, 163-173, doi:10.1007/s00227-016-2941-8  
542 (2016).
- 543 43 Leray, M. & Knowlton, N. Censusing marine eukaryotic diversity in the twenty-first  
544 century. *Philosophical Transactions of the Royal Society B: Biological Sciences* **371**,  
545 doi:10.1098/rstb.2015.0331 (2016).
- 546 44 Mohrbeck, I., Raupach, M. J., Martinez Arbizu, P., Knebelsberger, T. & Laakmann, S.  
547 High-throughput sequencing - the key to rapid biodiversity assessment of marine  
548 metazoa? *PLoS One* **10**, e0140342, doi:10.1371/journal.pone.0140342 (2015).
- 549 45 Torti, A., Lever, M. A. & Jorgensen, B. B. Origin, dynamics, and implications of  
550 extracellular DNA pools in marine sediments. *Marine Genomics* **24 Pt 3**, 185-196,  
551 doi:10.1016/j.margen.2015.08.007 (2015).
- 552 46 Barnes, M. A. & Turner, C. R. The ecology of environmental DNA and implications for  
553 conservation genetics. *Conservation Genetics* **17**, 1-17, doi:10.1007/s10592-015-0775-4  
554 (2016).

- 555 47 Nascimento, F. J. A., Lallias, D., Bik, H. M. & Creer, S. Sample size effects on the  
556 assessment of eukaryotic diversity and community structure in aquatic sediments using  
557 high-throughput sequencing. *Scientific reports* **8**, 11737, doi:10.1038/s41598-018-30179-  
558 1 (2018).
- 559 48 O'Donnell, J. L. *et al.* Spatial distribution of environmental DNA in a nearshore marine  
560 habitat. *PeerJ* **5**, e3044, doi:10.7717/peerj.3044 (2017).
- 561 49 Jeunen, G. J. *et al.* Environmental DNA (eDNA) metabarcoding reveals strong  
562 discrimination among diverse marine habitats connected by water movement. *Molecular*  
563 *Ecology Resources* **19**, 426-438, doi:10.1111/1755-0998.12982 (2019).
- 564 50 Wangensteen, O. S., Cebrian, E., Palacín, C. & Turon, X. Under the canopy: community-  
565 wide effects of invasive algae in marine protected areas revealed by metabarcoding.  
566 *Marine Pollution Bulletin* **127**, 54-66, doi:10.1016/j.marpolbul.2017.11.033 (2018).
- 567 51 Wangensteen, O. S., Palacin, C., Guardiola, M. & Turon, X. DNA metabarcoding of  
568 littoral hard-bottom communities: high diversity and database gaps revealed by two  
569 molecular markers. *PeerJ* **6**, e4705, doi:10.7717/peerj.4705 (2018).
- 570 52 Pawlowski, J. *et al.* The future of biotic indices in the ecogenomic era: Integrating  
571 (e)DNA metabarcoding in biological assessment of aquatic ecosystems. *Science of the*  
572 *Total Environment* **637-638**, 1295-1310, doi:10.1016/j.scitotenv.2018.05.002 (2018).
- 573 53 Aylagas, E., Borja, A., Muxika, I. & Rodríguez-Ezpeleta, N. Adapting metabarcoding-  
574 based benthic biomonitoring into routine marine ecological status assessment networks.  
575 *Ecological Indicators* **95**, 194-202, doi:10.1016/j.ecolind.2018.07.044 (2018).
- 576 54 Ficetola, G. F. *et al.* DNA from lake sediments reveals long-term ecosystem changes after  
577 a biological invasion. *Science Advances* **4**, eaar4292, doi:10.1126/sciadv.aar4292 (2018).
- 578 55 Pedersen, M. W. *et al.* Postglacial viability and colonization in North America's ice-free  
579 corridor. *Nature* **537**, 45, doi:10.1038/nature19085 (2016).
- 580 56 Balint, M. *et al.* Environmental DNA time series in ecology. *Trends in Ecology &*  
581 *Evolution* **33**, 945-957, doi:10.1016/j.tree.2018.09.003 (2018).
- 582 57 Scott, R. *et al.* Optimization and performance testing of a sequence processing pipeline  
583 applied to detection of nonindigenous species. *Evolutionary Applications* **11**, 891-905,  
584 doi:10.1111/eva.12604 (2018).

- 585 58 Stachowicz, J. J. & Byrnes, J. E. Species diversity, invasion success, and ecosystem  
586 functioning: disentangling the influence of resource competition, facilitation, and  
587 extrinsic factors. *Marine Ecology Progress Series* **311**, 251-262, doi:DOI  
588 10.3354/meps311251 (2006).
- 589 59 Sutherland, J. P. & Karlson, R. H. Development and stability of the fouling community at  
590 Beaufort, North Carolina. *Ecological Monographs* **47**, 425-446 (1977).
- 591 60 Bachelet, G. *et al.* A round-the-world tour almost completed: first records of the invasive  
592 mussel *Musculista senhousia* in the north-east Atlantic (southern Bay of Biscay). *Marine*  
593 *Biodiversity Records* **2**, 2002–2005, doi:10.1017/s1755267209001080 (2009).
- 594 61 Crooks, J. A. Assessing invader roles within changing ecosystems: historical and  
595 experimental perspectives on an exotic mussel in an urbanized lagoon. *Biological*  
596 *Invasions* **3**, 23-36 (2001).
- 597 62 Mistri, M. The non-indigenous mussel *Musculista senhousia* in an Adriatic lagoon:  
598 Effects on benthic community over a ten year period. *Journal of the Marine Biological*  
599 *Association of the United Kingdom* **83**, 1277-1278, doi:10.1017/S0025315403008658  
600 (2003).
- 601 63 Kushner, R. B. & Hovel, K. A. Effects of native predators and eelgrass habitat structure  
602 on the introduced Asian mussel *Musculista senhousia* (Benson in Cantor) in southern  
603 California. *Journal of Experimental Marine Biology and Ecology* **332**, 166-177,  
604 doi:10.1016/j.jembe.2005.11.011 (2006).
- 605 64 Crooks, J. A. & Khim, H. S. Architectural vs. biological effects of a habitat-altering,  
606 exotic mussel, *Musculista senhousia*. *Journal of Experimental Marine Biology and*  
607 *Ecology* **240**, 53-75, doi:Doi 10.1016/S0022-0981(99)00041-6 (1999).
- 608 65 Barfield, P., Holmes, A., Watson, G. & Rowe, G. First evidence of *Arcuatula senhousia*  
609 (Benson, 1842), the asian date mussel in UK waters. *Journal of Conchology* **43**, 217-222  
610 (2018).
- 611 66 Turner, A. D. *et al.* New invasive nemertean species (*Cephalothrix simula*) in England  
612 with high levels of tetrodotoxin and a microbiome linked to toxin metabolism. *Mar Drugs*  
613 **16**, doi:10.3390/md16110452 (2018).

- 614 67 Elbrecht, V. & Steinke, D. Scaling up DNA metabarcoding for freshwater  
615 macrozoobenthos monitoring. *Freshwater Biol* **64**, 380-387, doi:10.1111/fwb.13220  
616 (2019).
- 617 68 Wood, S. A. *et al.* Considerations for incorporating real-time PCR assays into routine  
618 marine biosecurity surveillance programmes: a case study targeting the Mediterranean  
619 fanworm (*Sabella spallanzanii*) and club tunicate (*Styela clava*). *Genome* **0**, 1-10,  
620 doi:10.1139/gen-2018-0021 (2018).
- 621 69 Blackman, R. C. *et al.* Detection of a new non-native freshwater species by DNA  
622 metabarcoding of environmental samples – first record of *Gammarus fossarum* in the UK.  
623 *Aquatic Invasions* **12**, 177-189, doi:10.3391/ai.2017.12.2.06 (2017).
- 624 70 Jarman, S. N., Berry, O. & Bunce, M. The value of environmental DNA biobanking for  
625 long-term biomonitoring. *Nature Ecology and Evolution* **2**, 1192-1193,  
626 doi:10.1038/s41559-018-0614-3 (2018).
- 627 71 Pearce, F., Peeler, E. & Stebbing, P. Modelling the risk of the introduction and spread of  
628 non-indigenous species in the UK and Ireland. *Project Report for E5405W. CEFAS*  
629 (2012).
- 630 72 Bishop, J. D. D., Wood, C. A., Yunnice, A. L. E. & Griffiths, C. A. Unheralded arrivals:  
631 non-native sessile invertebrates in marinas on the English coast. *Aquatic Invasions* **10**,  
632 249-264, doi:10.3391/ai.2015.10.3.01 (2015).
- 633 73 Calewaert, J. B., Weaver, P., Gunn, V., Gorringer, P. & Novellino, A. in *Quantitative*  
634 *Monitoring of the Underwater Environment: Results of the International Marine Science*  
635 *and Technology Event MOQESM '14 in Brest, France* (eds B. Zerr *et al.*) 31-46  
636 (Springer International Publishing, 2016).
- 637 74 Wood, C. A., Bishop, J. D. D., Rennocks, L. & Crundwell, R. RAS 2015: non-native  
638 species rapid assessment surveys in English marinas (E Anglia & W coast). 34pp (2016).
- 639 75 Wood, C. A., Bishop, J. D. D. & Yunnice, A. L. E. RAS 2014: non-native species rapid  
640 assessment surveys in English marinas. 34pp (2015).
- 641 76 Wood, C. A., Bishop, J. D. D. & Yunnice, A. L. E. Comprehensive Reassessment of NNS  
642 in Welsh Marinas. 42pp (2015).
- 643 77 Renshaw, M. A., Olds, B. P., Jerde, C. L., McVeigh, M. M. & Lodge, D. M. The room  
644 temperature preservation of filtered environmental DNA samples and assimilation into a



- 645 phenol-chloroform-isoamyl alcohol DNA extraction. *Molecular Ecology Resources* **15**,  
646 168-176, doi:10.1111/1755-0998.12281 (2015).
- 647 78 Leray, M. *et al.* A new versatile primer set targeting a short fragment of the mitochondrial  
648 COI region for metabarcoding metazoan diversity: application for characterizing coral  
649 reef fish gut contents. *Frontiers in Zoology* **10**, 34, doi:10.1186/1742-9994-10-34 (2013).
- 650 79 Zhan, A. *et al.* High sensitivity of 454 pyrosequencing for detection of rare species in  
651 aquatic communities. *Methods in Ecology and Evolution* **4**, 558-565, doi:10.1111/2041-  
652 210x.12037 (2013).
- 653 80 Bista, I. *et al.* Annual time-series analysis of aqueous eDNA reveals ecologically relevant  
654 dynamics of lake ecosystem biodiversity. *Nature Communications* **8**, 14087,  
655 doi:10.1038/ncomms14087 (2017).
- 656 81 MacConaill, L. E. *et al.* Unique, dual-indexed sequencing adapters with UMIs effectively  
657 eliminate index cross-talk and significantly improve sensitivity of massively parallel  
658 sequencing. *BMC Genomics* **19**, 30, doi:10.1186/s12864-017-4428-5 (2018).
- 659 82 R\_Core\_Team. R: a language and environment for statistical computing. *ISBN 3-900051-*  
660 *07-0* (2018).
- 661 83 Edgar, R. C. UPARSE: highly accurate OTU sequences from microbial amplicon reads.  
662 *Nature Methods* **10**, 996-998, doi:10.1038/nmeth.2604 (2013).
- 663 84 Martin, M. Cutadapt removes adapter sequences from high-throughput sequencing reads.  
664 *EMBnet Journal* **17**, 10-12 (2011).
- 665 85 Rognes, T., Flouri, T., Nichols, B., Quince, C. & Mahe, F. VSEARCH: a versatile open  
666 source tool for metagenomics. *PeerJ* **4**, e2584, doi:10.7717/peerj.2584 (2016).
- 667 86 Frøslev, T. G. *et al.* Algorithm for post-clustering curation of DNA amplicon data yields  
668 reliable biodiversity estimates. *Nature Communications* **8**, 1188, doi:10.1038/s41467-  
669 017-01312-x (2017).
- 670 87 Camacho, C. *et al.* BLAST+: architecture and applications. *BMC Bioinformatics* **10**, 421,  
671 doi:10.1186/1471-2105-10-421 (2009).
- 672 88 Machida, R. J., Leray, M., Ho, S. L. & Knowlton, N. Metazoan mitochondrial gene  
673 sequence reference datasets for taxonomic assignment of environmental samples.  
674 *Scientific Data* **4**, 170027, doi:10.1038/sdata.2017.27 (2017).



- 675 89 Quast, C. *et al.* The SILVA ribosomal RNA gene database project: improved data  
676 processing and web-based tools. *Nucleic Acids Research* **41**, D590-596,  
677 doi:10.1093/nar/gks1219 (2013).
- 678 90 WoRMS\_Editorial\_Board. *World Register of Marine Species*,  
679 <<http://www.marinespecies.org>> (2019).
- 680 91 Ahyong, S. *et al.* *World Register of Introduced Marine Species (WRiMS)*,  
681 <[www.marinespecies.org/introduced](http://www.marinespecies.org/introduced)> (2019).
- 682 92 Oksanen, J. *et al.* Vegan: community ecology package. *R package* **1**, 17 (2011).
- 683 93 Anderson, M. J. in *Wiley Stats Ref: Statistics Reference Online* (eds N. Balakrishnan *et*  
684 *al.*) 1-15 (John Wiley & Sons, Ltd, 2014).
- 685 94 Benjamini, Y. & Hochberg, Y. Controlling the false discovery rate - a practical and  
686 powerful approach to multiple testing. *J R Stat Soc B* **57**, 289-300 (1995).

687

## 688 **Acknowledgements**

689 We are grateful to John Bishop and Chris Wood from the Marine Biological Association of the  
690 United Kingdom for sharing information on marinas and their excellent NIS survey data. We  
691 thank the staff of the Environmental Sequencing Facility from the National Oceanography Centre  
692 Southampton for advice and assistance during library preparation. We thank Dr Ivan Haigh for  
693 assistance in accessing remote sensing data. We acknowledge the Department of Geography and  
694 Environment from the University of Southampton for access to coring equipment and lab space.  
695 LH was supported by the Natural Environmental Research Council (grant number  
696 NE/L002531/1).

697

## 698 **Competing Interests**

699 The authors declare no competing interests.

700

## 701 **Author Contributions**

702 L.E.H. and M.R. designed the experiment, L.E.H. collected samples, generated and analysed the  
703 data, designed all figures and wrote the first draft of the paper. All authors contributed critically  
704 to the drafts and gave final approval for publication.

705

706 **Data Availability**

707 Raw Illumina sequencing data is available from the European Nucleotide Archive under  
708 accession number (data will be uploaded upon acceptance, available to reviewers upon request).

709 Associated metadata, script and intermediate files can be found on GitHub with the following

710 DOI: 10.5281/zenodo.1453959.

711

712

713

714

715

716

717

718

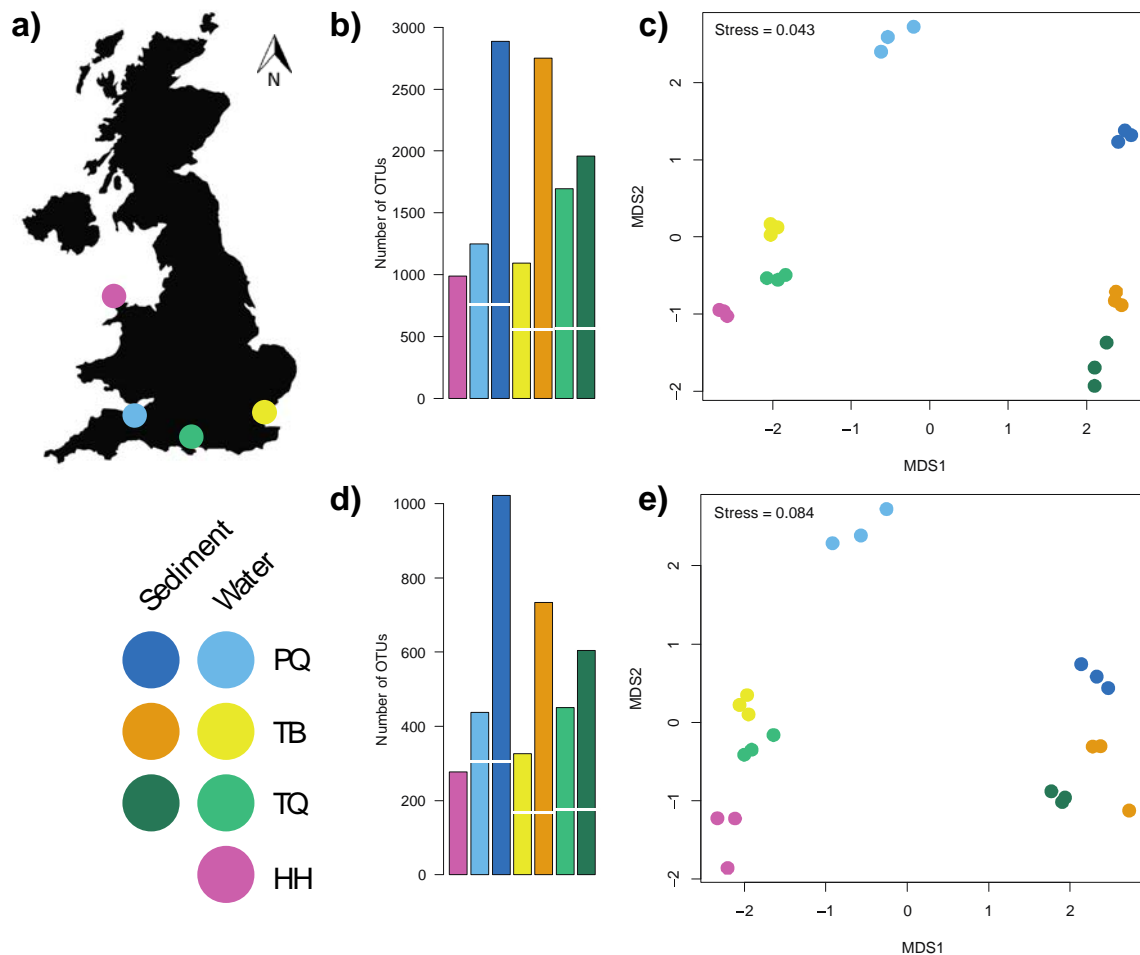

719  
 720 **Fig. 1.** a) Map of United Kingdom indicating the geographic position of the sampled sites, a  
 721 legend is provided below indicating the four sites (PQ, TB, TQ and HH) and colours for water  
 722 and sediment eDNA samples for each site. Barplots detailing number of OTUs detected across  
 723 sampling sites and eDNA sample type for COI b) and 18S rRNA d) metabarcoding of UK  
 724 marinas, the break in bars indicates the number of shared OTUs between sediment and water  
 725 eDNA samples. Non-metric multidimensional scaling ordination plots based on Bray-Curtis  
 726 dissimilarities between: c) COI and e) 18S rRNA metabarcoding of marina sediment and water  
 727 eDNA samples.

728

729

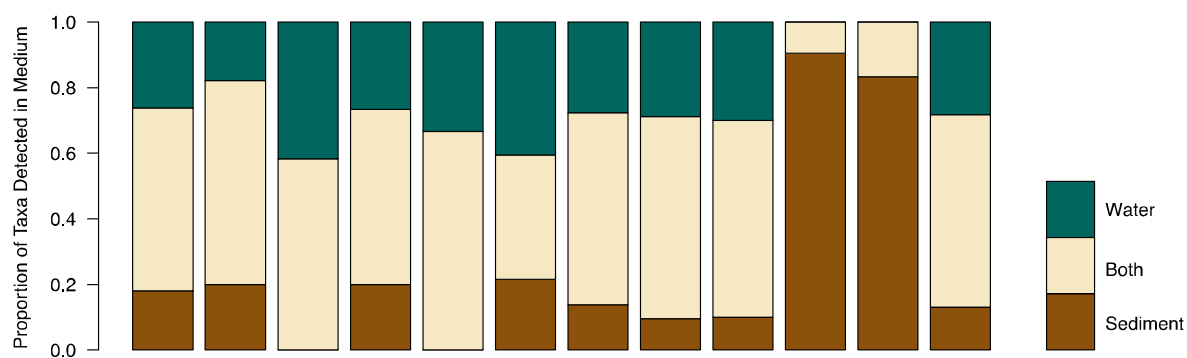

730  
731  
732 **Fig. 2.** Horizontal stacked barchart detailing proportion of OTUs detected in eDNA from  
733 sediment, water or both sediment and water across the 14 phyla for pooled 18S rRNA and COI  
734 metabarcoding of UK marinas.  
735  
736  
737

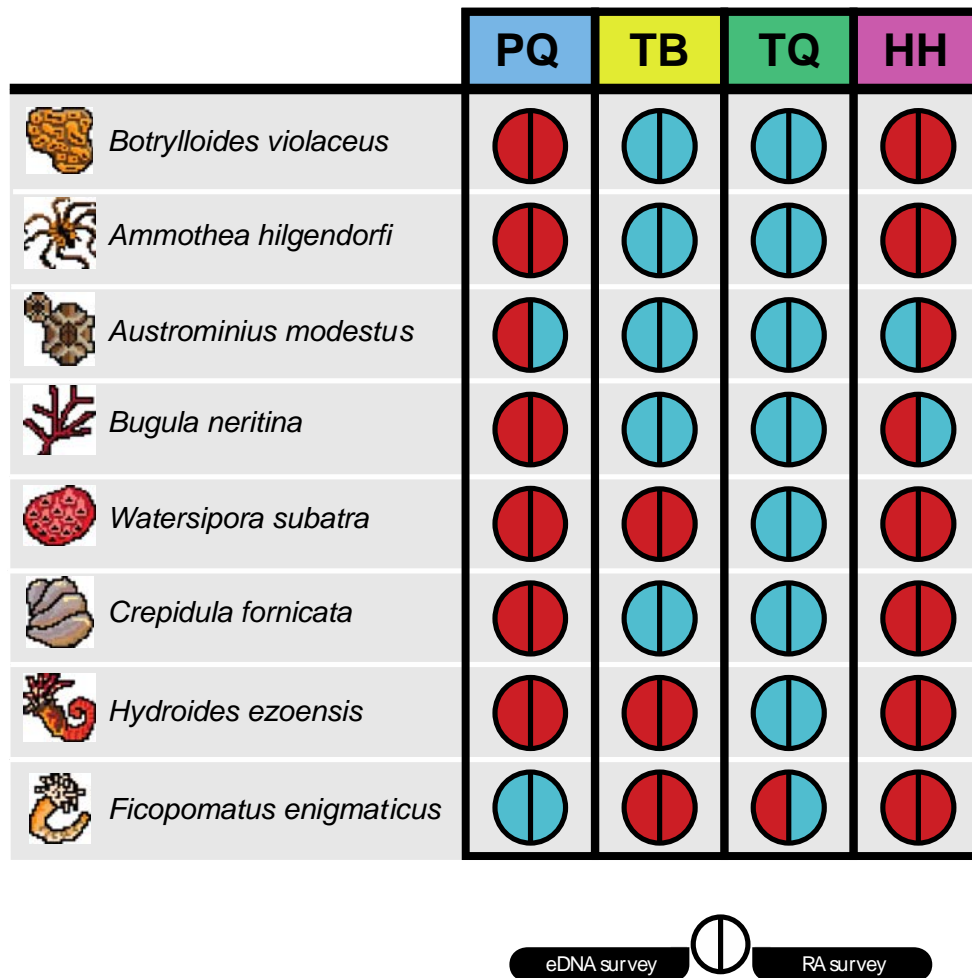

738  
 739 **Fig. 3.** Presence absence diagram for seven non-indigenous species across four sampling sites.  
 740 For each species-location the left semi-circle indicates the detection using eDNA metabarcoding  
 741 surveys of 18S rRNA and COI fragments, and the right semi-circle indicates the detection from  
 742 rapid assessment (RA) surveys. Blue indicates a positive detection for that species-location and  
 743 red indicates no detection.  
 744
