1 **Detection of introduced and resident marine species using environmental DNA**  
2 **metabarcoding of sediment and water**

3

4 Mr. Luke E. Holman<sup>1\*</sup> (ORCID: 0000-0002-8139-3760)

5 Dr. Mark de Bruyn<sup>2,3</sup>

6 Prof. Simon Creer<sup>2</sup>

7 Prof. Gary Carvalho<sup>2</sup>

8 Dr. Julie Robidart<sup>4</sup>

9 Dr. Marc Rius<sup>1,5</sup> (ORCID: 0000-0002-2195-6605)

10

11 <sup>1</sup> School of Ocean and Earth Science, National Oceanography Centre Southampton, University of  
12 Southampton, United Kingdom

13 <sup>2</sup> Molecular Ecology and Fisheries Genetics Laboratory, School of Natural Sciences, Bangor  
14 University, United Kingdom

15 <sup>3</sup> The University of Sydney, School of Life and Environmental Sciences, Australia

16 <sup>4</sup> Ocean Technology and Engineering Group, National Oceanography Centre Southampton,  
17 United Kingdom

18 <sup>5</sup> Centre for Ecological Genomics and Wildlife Conservation, University of Johannesburg, South  
19 Africa

20

21

22 \*Corresponding Author

23 Email: l.e.holman@soton.ac.uk

24

25

26

27

28

29

30

31

32 **Abstract**

33 Environmental DNA (eDNA) surveys are increasingly being used for biodiversity monitoring,  
34 principally because they are sensitive and can provide high resolution community composition  
35 data. Despite considerable progress in recent years, eDNA studies examining how different  
36 environmental sample types can affect species detectability remain rare. Comparisons of  
37 environmental samples are especially important for providing best practice guidance on early  
38 detection and subsequent mitigation of non-indigenous species. Here we used eDNA  
39 metabarcoding of COI (cytochrome c oxidase subunit I) and 18S (nuclear small subunit  
40 ribosomal DNA) genes to compare community composition between sediment and water samples  
41 in artificial coastal sites across the United Kingdom. We first detected markedly different  
42 communities and a consistently greater number of distinct operational taxonomic units in  
43 sediment compared to water. We then compared our eDNA datasets with previously published  
44 rapid assessment biodiversity surveys and found excellent concordance among the different  
45 survey techniques. Finally, our eDNA surveys detected many non-indigenous species, including  
46 several newly introduced species, highlighting the utility of eDNA metabarcoding for both early  
47 detection and temporal / spatial monitoring of non-indigenous species. We conclude that careful  
48 consideration on environmental sample type is needed when conducting eDNA surveys,  
49 especially for studies assessing community change.

50  
51  
52  
53  
54  
55  
56  
57  
58  
59  
60  
61  
62

## 63 **Introduction**

64 Anthropogenic activities have widespread impacts on global biodiversity<sup>1,2</sup> and can negatively  
65 affect ecosystem services and function<sup>3</sup>. Cumulatively these actions create an urgent need to  
66 develop monitoring tools that rapidly and accurately detect community composition in  
67 ecosystems. Existing biodiversity survey techniques have been criticised for their methodological  
68 limitations (e.g. observer bias or taxonomic resolution)<sup>4,5</sup> and are typically standardised by a  
69 survey time limit or through reaching asymptote of a species discovery curve<sup>6,7</sup>. Such surveys  
70 often focus on the detection of a specific taxonomic group that are being targeted, with no ability  
71 to retrospectively separate mis-identified species in light of new species discoveries. This is of  
72 critical importance for biodiversity monitoring as an increasing number of studies are revealing  
73 the widespread presence of molecular cryptic species (i.e. morphologically similar but  
74 genetically distinct species<sup>8</sup>). For example, between 9,000-35,000 marine species (2.7% of the  
75 total number of known marine species) are considered molecular cryptic, and genetic studies  
76 often reveal widespread marine species containing multiple cryptic lineages<sup>9,10</sup>. This highlights  
77 the need to integrate morphological and genetic approaches to accurately detect community  
78 composition.

79 One approach that has the potential to overcome some of the above limitations is the use of  
80 nucleic acids found in environmental samples, such as water, soil or sediment, to infer presence  
81 or absence of living organisms in the ecosystem<sup>11</sup>. This genetic material, known as  
82 environmental DNA (eDNA), is a poly-disperse mixture of tissue, cells, subcellular fragments  
83 and extracellular DNA lost to the environment through the normal life and death of  
84 organisms<sup>12,13</sup>. Environmental DNA surveys have been used in targeted detection (i.e. single  
85 species) studies with qPCR assays<sup>14-17</sup>, and in community (i.e. multi-species) studies using  
86 metabarcoding<sup>18-20</sup>. These surveys are highly sensitive and once the methodology is optimised  
87 are amenable to automation<sup>21</sup>. However, validity and replicability rely on appropriate  
88 experimental design and an understanding of the effects of methodological choices during  
89 sampling, sequencing library preparation and bioinformatic analysis<sup>22,23</sup>. Although it is well-  
90 established that eDNA surveys are highly informative and can complement other biodiversity  
91 monitoring methods<sup>24</sup>, eDNA studies assessing how different sampling techniques affect species  
92 detectability remain rare.

93 One area where accurate monitoring tools are critical is the detection of non-indigenous species  
94 (NIS). NIS are those that have been transported through human action from their native range  
95 into a novel geographic location. Only a subset of the total number of NIS have a net negative  
96 effect<sup>25</sup> but these pose a severe threat to anthropogenic activities, human health and indigenous  
97 biodiversity<sup>26-30</sup>. Most marine NIS have spread globally via vectors such as transoceanic shipping  
98 or canals connecting large water bodies<sup>30,31</sup>. At smaller (10s of km) geographical scales, other  
99 vectors such as intraregional boating significantly enhance the spread of NIS<sup>32</sup>. In coastal areas,  
100 studies have highlighted the importance of monitoring marinas and harbours<sup>6</sup>, as these are  
101 hotspots of NIS and together with marine infrastructure (e.g. breakwaters, artificial reefs)  
102 promote the spread of NIS<sup>33</sup>. In these habitats, NIS often outcompete native resident species and  
103 dominate artificial hard substrata<sup>34,35</sup>. Marinas and harbours have distinct ecological and physico-  
104 chemical conditions compared to the surrounding marine environment<sup>36,37</sup>. Consequently,  
105 specific sampling and surveying protocols are needed to study marine organisms in these  
106 environments, with eDNA surveys offering huge promise for early detection and management of  
107 NIS.

108 Recent work has identified a vast range of protocols for the collection and extraction of eDNA  
109 from different environmental sample types (e.g. water, sediment)<sup>38-40</sup>. Despite this progress, we  
110 are only just beginning to understand how the choice of environmental sample type affects  
111 species detectability<sup>41,42</sup>. For example, we would not expect to detect nektonic in addition to  
112 benthic organisms in morphological analyses of a sediment core, but several eDNA studies have  
113 detected both of these groups in eDNA isolated from marine sediment<sup>41,43</sup>. Understanding which  
114 proportion of the total community is detected using eDNA isolated from different sample types is  
115 essential to place eDNA surveys in the context of existing methods, especially when studying  
116 NIS.

117 Here we used eDNA metabarcoding of COI (cytochrome c oxidase subunit I) and 18S (nuclear  
118 small subunit ribosomal DNA) genes to compare alpha and beta diversity between sediment and  
119 water samples collected in marine urban environments. We then compared the eDNA  
120 metabarcoding results with previously published biodiversity data to identify if NIS detection  
121 was comparable between methods. We subsequently parsed our eDNA metabarcoding dataset to  
122 identify globally relevant NIS and several recently introduced NIS in the study region. We then  
123 outlined the strengths and weaknesses of eDNA metabarcoding for the detection of NIS and

124 more broadly community composition. Finally, we discussed how this technique can help  
125 conservation efforts for both assessing indigenous biodiversity and mitigating the deleterious  
126 effects of NIS.

127

128

## 129 **Results**

### 130 *Raw sequencing results and OTU generation*

131 Sequencing produced a total of 17.8 million paired end reads, with 15.2 million sequences  
132 remaining after paired end read merging and quality filtering. The average number of sequences  
133 per sample after filtering (excluding those from control samples) was  $200,185 \pm 64,019$  (s.d.).  
134 Negative control samples contained an average of  $811 \pm 3,402$  (s.d.) sequences. One negative  
135 control sample contained ~15,000 sequences that mapped to an operational taxonomic unit  
136 (OTU) having 100% identity to a sequence of a terrestrial fungi (Genbank Accession number:  
137 FJ804151.1), excluding this OTU from the entire analysis resulted in an average of  $51 \pm 94$  (s.d.)  
138 sequences per no-template control sample. Denoising produced 8,069 OTUs for COI and 2,433  
139 for 18S with 6,435 and 1,679 remaining respectively after OTU curation with LULU. Taxonomic  
140 annotation identified 622 OTUs from the 18S rRNA dataset and 481 OTUs from the COI dataset.  
141 Taxonomic data from World Register of Marine Species could be retrieved for 200 of the  
142 annotated COI OTUs and 190 of the 18S OTUs.

143

### 144 *Biodiversity detection*

145 The effects of preservation techniques for water eDNA samples differed between the target  
146 amplicons. The 18S rRNA amplicon produced significantly more OTUs (Wilcoxon signed-rank  
147 test,  $p < 0.05$ ) in samples preserved by freezing compared to Longmire's preservation method,  
148 while no significant differences (Wilcoxon signed-rank test,  $p = 0.55$ ) between preservation  
149 treatments were observed for the COI amplicon (see Supplementary Information 2 for details).  
150 As a conservative approach all subsequent analyses used sample data from the frozen samples.  
151 The minimum number of reads per sample was 137,624 and 117,915 for the COI and 18S  
152 datasets, respectively, and so samples were rarefied to these numbers of reads. A consistently  
153 greater number of OTUs were detected in the sediment samples compared to the water samples  
154 across all sites and both markers as shown in Fig 1b,c. In all cases, unique OTUs were detected

155 in both water and sediment samples, but the mean proportion of unique OTUs across 18S and  
156 COI detected in water was lower (49.2%) than in sediment (73.8%). A two-way ANOVA testing  
157 the effects of sample type, site and their interaction on the number of OTUs indicated a  
158 significant effect of the site-sample type interaction ( $p < 0.001$ ) for both 18S and COI (see  
159 Supplementary Information 3 for full model output). Ordination plots based on the Bray-Curtis  
160 dissimilarities (Fig. 1d,e) showed that OTUs found in sediment and water eDNA differed in  
161 community structure as much as among sites. Additionally, the PERMANOVA model indicated  
162 significant differences ( $p < 0.001$ ) among sites and eDNA sample types in both the 18S and COI  
163 datasets (see Supplementary Information 4 for full model output). Accordingly, eDNA sample  
164 type in the PERMANOVA model explained 23.2% and 32.5% of the variation in the 18S and  
165 COI data respectively, while site explained 34.2% and 30.5% in the COI and 18S data. At  
166 phylum level (Fig. 2), taxonomy did not predict the sample type of detections. However, an exact  
167 binomial goodness of fit test showed non-random detection proportions in the Nematoda and  
168 Platyhelminthes ( $p < 0.001$  and  $p = 0.038$  respectively, see Supplementary Information 5 for full  
169 details), with eDNA detections mostly in sediment in both cases.

170

#### 171 *Detection of non-indigenous species*

172 As the 18S region lacks the appropriate resolution for taxonomic assignments at species level<sup>44,45</sup>  
173 only the taxonomic assignments from the COI were considered for the identification of NIS. In  
174 total 18 NIS to the study region and 24 species documented as NIS in other regions were detected  
175 across the four sites (see Supplementary Table 2 for full list). Out of the detected NIS, eight were  
176 present in the list of 21 NIS previously detected in rapid assessment (RA) surveys at the  
177 sampling sites<sup>46-48</sup>. As shown in Fig. 3, the results of the eDNA surveys closely matched those of  
178 the RA surveys. Four detections differed from the RA surveys, a single eDNA detection not seen  
179 in RA and three RA detections not seen in eDNA surveys (Fig. 3). Remapping of raw reads from  
180 sites with incongruent detections to respective COI regions (Genbank Accessions: *Austrominius*  
181 *modestus* KY607884; *Bugula neritina* KY235450; *Ficopomatus enigmatus* KX840011) found  
182 hits for the bryozoan *B. neritina* only (five reads from a single replicate). These reads were lost  
183 during data filtering and so did not feature in the final dataset. Three species detections in site TQ  
184 represented novel introductions: the detection of *Arcuatula senhousia* (Asian date mussel), the  
185 nemertean *Cephalothrix simula* and the oligochaete *Paranaeis frici*. Targeted visual surveys on

186 tidal mudflats within two kilometres of Marina TQ confirmed the presence of live *A. senhousia*  
187 individuals. Furthermore, we generated COI sequences from tissue samples of these individuals  
188 (Genbank Accession: MH924820 and MH924821) and these provided full length, high identity  
189 matches to both known *A. senhousia* DNA sequences and our eDNA derived OTU sequence (see  
190 Supplementary Information 6 for details of DNA barcoding).

191

## 192 **Discussion**

193 We demonstrated that the type of environmental sample in eDNA metabarcoding studies affects  
194 the measured community composition, indicating that the most comprehensive assessment of  
195 biodiversity in a given community comes from the collection of multiple environmental sample  
196 types. In addition, we found concordance between our eDNA metabarcoding data and previous  
197 biodiversity surveys, demonstrating complementarity of different biodiversity assessment  
198 methods. Furthermore, we detected recently introduced NIS, providing support for eDNA  
199 metabarcoding as an effective tool for early detection of NIS. This is key as early detection of  
200 NIS greatly increases the likelihood of successful control and eventual eradication of NIS.  
201 Overall, we demonstrate that type of environmental sample can affect the detection of both whole  
202 community composition and particular species of concern.

203 Our study showed that taxonomic assignments at the level of Phylum did not predict if a species  
204 was detected in water, sediment or both environmental sample types (except in Nematodes and  
205 Platyhelminthes, whose members are predominantly benthic inhabitants). However, all sampled  
206 sites showed higher OTU richness in sediment compared to water. The magnitude of this  
207 difference was not fixed across sites, with a significant interaction term in our two-way ANOVA  
208 (Supplementary Information 3) indicating that the detected OTU richness differences between  
209 sediment and water vary spatially. The majority of research using eDNA to detect aquatic  
210 macrofauna has focused on the collection of water samples, while sediment samples have  
211 received comparatively less attention (see Figure S1 from Koziol, et al. <sup>41</sup>). This is surprising  
212 considering that sediment samples typically contain three orders of magnitude more eDNA than  
213 water<sup>49</sup>. Despite our observations that sediment provided a greater number of OTU richness than  
214 water samples, we do not advocate for a particular sample type, as this decision should be driven  
215 by the target organisms for a given study. For example, a researcher hoping to use eDNA  
216 metabarcoding to measure Nematode diversity, based on our results, should sample marine

217 sediment. Regarding NIS, both water and sediment served as excellent sample types for NIS  
218 detection. Consequently, our results suggest that no specific sample type offers a better detection  
219 of NIS, likely because NIS are not found in a single taxonomic group. We argue that at a lower  
220 taxonomic level the species-specific ecology of eDNA (*sensu* Barnes and Turner<sup>50</sup>) may lead to  
221 convergent eDNA occupancy in different environmental sample types. Further work is needed to  
222 clarify how eDNA partitions into adjacent environmental samples across the tree of life. A key  
223 unknown is the underlying explanation for eDNA metabarcoding data from sediment samples  
224 generating more OTUs in comparison to water. One hypothesis is that eDNA from sediment  
225 includes extracellular ‘free’ DNA that is not retained by the filters used to process water for  
226 eDNA samples. Studies focussing on eDNA surveys have found little evidence identifying what  
227 proportion of total eDNA is extracellular DNA. However, using qPCR Turner, et al.<sup>12</sup> identified  
228 that eDNA particles with a size of less than 0.2µm, well above the size of extracellular DNA, are  
229 less than 10% of the total eDNA pool for a teleost fish species. If this pattern is observed in other  
230 metazoans then extracellular eDNA may have little effect on the differences of OTU richness  
231 detected here. An alternative hypothesis is that due to the settlement and persistence dynamics of  
232 sediment, it contains a greater diversity of eDNA fragments (both extra and intracellular).  
233 However, we know very little about these processes and their comparative effects in sediment are  
234 unknown.

235 Current eDNA metabarcoding research has identified large variation in the detected marine  
236 biodiversity across small spatial scales (100s of metres) in both sediment<sup>51</sup> and water<sup>52,53</sup>.  
237 Additionally, fractionation of environmental samples (i.e. sorting samples by particle size class)  
238 can produce significant differences in the metabarcoding results between fractions<sup>54,55</sup> indicating  
239 significant variation can be found within sites. We found similar patterns, with PERMANOVA  
240 modelling indicating that site and environmental sample type contain approximately equivalent  
241 variation in OTU dissimilarity. Future research should explore how different sample types and  
242 eDNA extraction methods affect the detection of biodiversity, especially as eDNA  
243 metabarcoding moves from an experimental technique to a routine monitoring tool<sup>56,57</sup>.

244 A key gap in our understanding is the rate at which eDNA degrades in sediment and how this  
245 affects our observations. In lake sediments, eDNA can be preserved for thousands of years<sup>58,59</sup>,  
246 with eDNA being preserved along with deposited sediments so each core represents a timeline  
247 through which past biological community communities can be examined<sup>60</sup>. Here we chose to



248 process only the uppermost section of the sampled cores, with the aim of profiling contemporary  
249 species composition. Studies are needed to advance our understanding of how eDNA deposits  
250 and degrades in marine sediments in order to temporally contextualise sediment samples.  
251 We found that eDNA metabarcoding accurately detected many NIS, as seen in previous studies<sup>18-</sup>  
252 <sup>20</sup>. By comparing our eDNA data to those collected using existing methods we found close  
253 congruence in NIS incidence. The false-negative eDNA detection of *B. neritina* was found to be  
254 a result of setting specific bioinformatic parameters, showing that choices made during sequence  
255 processing can have a significant effect on the detectability of species in eDNA samples. Indeed,  
256 this has previously been shown in metabarcoding of bulk tissue samples<sup>61</sup> and work is urgently  
257 needed to determine the effects of bioinformatic parameters, variable primer binding sites and the  
258 choice of reference databases on the detection of NIS from eDNA samples. The remaining  
259 incongruent detections may be a result of community turnover among the survey dates or  
260 phenological changes affecting species distributions. Indeed, marine coastal communities have  
261 been shown to shift in community composition across seasons and reproductive cycles<sup>62,63</sup>.  
262 Therefore, our data suggest that in order to enhance existing monitoring programmes, replicated  
263 eDNA metabarcoding surveys over time should be performed. In this study we identified several  
264 recently introduced NIS in the United Kingdom and confirmed the eDNA detection with targeted  
265 local surveys for one NIS. The case of *A. senhousia* is particularly relevant as it is spreading  
266 globally<sup>64</sup> and has the potential to dramatically alter benthic biodiversity when invasive<sup>65,66</sup>. This  
267 species produces a cocoon of byssus thread that at high densities (>1,500 individuals/m<sup>2</sup>)  
268 interlinks between individuals to form a continuous byssal mat which displaces local eelgrass and  
269 native bivalves<sup>67,68</sup>. Recent field surveys along the south coast of the United Kingdom have  
270 independently confirmed the presence of both *A. senhousia*<sup>69</sup> and *C. simula*<sup>70</sup>. These results  
271 confirm the accuracy of eDNA surveys presented here and highlight the benefits of implementing  
272 molecular technologies for routine monitoring programmes. As the cost of sequencing continues  
273 to decrease and methods improve across the metabarcoding workflow<sup>71</sup> natural resource  
274 managers and researchers will have access to much greater resolution data at a fraction of the  
275 cost and time of current monitoring surveys. However, NIS can be missed in surveys based  
276 solely on eDNA (e.g. Wood, et al. <sup>72</sup>) and eDNA studies can detect rare species that are often  
277 missed using other methods<sup>73</sup>. Detection of NIS could be further facilitated through autonomous  
278 sampling and eDNA surveys<sup>21</sup> to provide live species incidence data in introduction hotspots,

279 such as ports or marinas. Additionally combining these techniques with eDNA biobanking<sup>74</sup>  
280 could provide an eDNA reference database for specific geographical regions of high biosecurity  
281 risk, providing an invaluable resource for both biodiversity managers and researchers to examine  
282 the process of biological invasion through time. Taken together, our study shows eDNA  
283 metabarcoding to be an effective tool for the detection and identification of both native and NIS  
284 from different environmental samples.

285

## 286 **Methods**

### 287 *Study sites*

288 Four marinas were selected from around the United Kingdom (Fig. 1a) to represent variation in  
289 modelled invasion potential<sup>75</sup>, presence of NIS<sup>76</sup> and benthic habitat type<sup>77</sup>. All chosen marinas  
290 have been surveyed previously, so there is a good understanding of the species found in these  
291 sites<sup>46-48</sup>. Marina access was contingent on anonymity and so marina names and exact locations  
292 are not provided, with Fig. 1a showing approximate locations only. Marina *TQ* is an open marina  
293 subject to tides and varying salinity, marina *PQ* is a loch marina open during high tide, and  
294 marinas *TB* and *HH* are permanently open to the North and Celtic Sea respectively.

295

### 296 *Environmental DNA sampling*

297 Surveys were conducted during May 2017 (see Supplementary Table 1 for site details) and 24  
298 sampling points were randomly selected within each site. At each sampling point 50ml of water  
299 was collected from 10cm below the surface using a sterile 60ml Luer lock syringe and filtered  
300 through a 0.22µm polyethersulfone Sterivex filter (Merck Millipore, Massachusetts USA). After  
301 collecting seawater from eight sampling points (400ml total volume) the filter was changed,  
302 resulting in a total of three filters per site. Pooling of water samples was performed to provide  
303 three filter replicates per site that represented the heterogeneity of eDNA in the marina. In order  
304 to test the effect of different sample preservation methods, water samples were collected in  
305 duplicate in each sampling point. One set of three filters had ~1.5ml sterile Longmire's solution  
306 (100mM Tris, 10mM EDTA, 10mM NaCl, 0.5% SDS) applied in the inlet valve<sup>78</sup>. The second set  
307 of three filters was kept on ice for no longer than eight hours before being frozen at -20°C. In  
308 addition to the water samples, a subtidal sediment sample was collected at the first water  
309 sampling point and then after every three water samples, accounting for a total of nine sediment

310 samples per site. We used a UWITEC Corer (UWITEC, Mondsee, Austria) to collect a sediment  
311 core of 600mm high and 60mm diameter. We then used a sterile disposable spatula to collect a  
312 subsample of 10-20g of sediment from the top 2cm of the core, avoiding sediment collection  
313 from the sides of the core. The subsamples were stored in sterile plastic bags and kept on ice for  
314 no longer than eight hours before being frozen at -80°C. Due to a malfunction of the corer, no  
315 sediment sample was collected in Site HH. Disposable gloves were changed after collection of  
316 each sample. All reused equipment was soaked in 10% bleach and rinsed in DNase-free sterile  
317 water between sites.

318

### 319 *eDNA extraction*

320 DNA extractions were performed in a PCR-free clean room, separate from main laboratory  
321 facilities. No high copy templates, cultures or amplicons were permitted in this clean laboratory.  
322 DNA extractions from water samples followed the SX<sub>CAPSULE</sub> method by Spens, et al. <sup>39</sup>. Briefly,  
323 preservative solution was removed from the outlet and filters were dried at room temperature for  
324 two hours. We then added 720µl Qiagen buffer ATL (Qiagen, Hilden, Germany) and 80µl  
325 Proteinase K to the filter and all samples were digested overnight at 56°C. After digestion,  
326 samples were processed using the Qiagen DNeasy Blood and Tissue Kit as per manufacturer  
327 instructions, with a final elution of 200µl PCR grade water.

328 Sediment extractions were conducted using the Qiagen DNeasy Powermax Soil Kit following the  
329 manufacturer's protocol. The nine samples collected in each site were randomly mixed to form  
330 three pooled samples; 10g of pooled sample was processed for the extraction. A total of ten  
331 samples were processed, three from each site with a single extraction control.

332

### 333 *Inhibition testing*

334 To ensure extracted DNA was free of PCR inhibitors, a Primer Design Real-Time PCR Internal  
335 Control Kit (PrimerDesign, Southampton, United Kingdom) was used. We performed qPCR  
336 reactions on each extracted DNA sample following the manufacturer's protocol with 12.5µl  
337 reaction volumes. A positive detection of inhibition due to co-purified compounds from DNA  
338 extraction protocols would produce an increase in cycle threshold number in comparison to no  
339 template controls. All samples were successfully processed and no samples showed indication of  
340 PCR inhibition.

341  
342 *Primer selection and library preparation*  
343 Two sets of primers were chosen for metabarcoding the environmental samples: a 313bp section  
344 of the standard DNA barcoding region of the cytochrome c oxidase subunit I gene (COI) using  
345 primers described in Leray, et al.<sup>79</sup>; and a variable length target of the hypervariable V4 region  
346 of the nuclear small subunit ribosomal DNA (18S) using primers from Zhan, et al.<sup>80</sup>. These two  
347 primer sets allow for broad characterisation of marine metazoan diversity. Sequencing libraries  
348 were prepared using a 2-step PCR approach as detailed in Bista, et al.<sup>81</sup>. Briefly, this method  
349 first amplifies the target region in PCR 1 annealing universal adapters, and then sample specific  
350 indices and sequencing primers are annealed in PCR 2. In contrast to Bista, et al.<sup>81</sup> we used  
351 unique dual-matched indexes for PCR 2 to avoid index crosstalk associated with combinatorial  
352 indexing<sup>82</sup>. PCR 1 was prepared in a PCR-free room separate from main laboratory facilities.  
353 PCR 1 reactions were conducted in 20µl volumes containing 10µl Amplitaq GOLD 360 2X  
354 Mastermix (Applied Biosystems, California, USA), 0.8µl (5 nmol ml<sup>-1</sup>) of each forward and  
355 reverse primer and 2µl of undiluted environmental DNA extract. The reaction conditions for PCR  
356 were an initial denaturation step at 95°C for 10 minutes followed by 20 cycles of 95°C for 0:30,  
357 variable annealing temp (46°C for COI and 50°C for 18S) for 0:30, and extension at 72°C for  
358 1:00. A final extension at 72°C was performed for 10 minutes. The PCR product was cleaned  
359 using AMPure XP beads (Beckman Coulter, California, USA) at a 0.8 beads:sample ratio  
360 following manufacturer's instructions. PCR 2 reactions were conducted in 20µl volumes  
361 containing 10µl Amplitaq GOLD 360 2X Mastermix, 0.5µl (10 nmol ml<sup>-1</sup>) of both forward and  
362 reverse primers and 5µl of undiluted cleaned PCR1 product. PCR conditions were an initial  
363 denaturation step at 95°C for 10 minutes followed by 15 cycles of 95°C for 0:30, annealing at  
364 55°C for 0:30, and extension at 72°C for 1:00. A final extension at 72°C was performed for 10  
365 minutes. PCR 2 products were cleaned using AMPure XP beads as above and normalised  
366 according to their fluorescence using the Qubit HS Assay Kit (Thermofisher Scientific,  
367 Massachusetts, USA). These normalised samples were pooled at an equimolar concentration and  
368 then quantified as per manufacturer's instructions using the NEBNext Library Quant qPCR kit  
369 (New England Biolabs, Massachusetts, USA).  
370 Blank filters, DNA extraction kits and positive controls were collected, extracted and sequenced  
371 identically to non-control samples (detailed in Supplementary Information 1). Negative controls

372 cannot be meaningfully normalized and thus they were added to the pooled libraries without  
373 dilution. The final library was sequenced using an Illumina MiSeq instrument (Illumina, San  
374 Diego, USA) with a V3 2 x 300bp kit.

375

### 376 *Bioinformatic analyses*

377 Samples were demultiplexed using the Illumina MiSeq control software (v.2.6.2.1). The  
378 demultiplexed data was analysed using a custom pipeline written in the R programming  
379 language<sup>83</sup> (hosted at <https://github.com/leholman/metabarTOAD>). The steps are as follows.  
380 Forward and reverse paired end reads were merged using the `-fastq_mergepairs` option of  
381 USEARCH v.10.0.240<sup>84</sup> with maximum difference of 15, percent identity of 80% and quality  
382 filter set at maximum expected errors of 1. Both the forward and reverse primer sequences were  
383 matched using Cutadapt v.1.16<sup>85</sup> and only sequences containing both primer regions were  
384 retained. Sequences were discarded if they were outside of a defined length boundary (303-  
385 323bp for COI, 375-450bp for 18S) using Cutadapt. Sequences were then pooled, singletons  
386 were discarded and sequences were quality filtered with a maximum expected error of 1 using  
387 the `-fastq_filter` option of vsearch v.2.4.3<sup>86</sup>. Sequences were then denoised and chimeras filtered  
388 using the `unoise3` algorithm implemented in USEARCH. The resultant operational taxonomic  
389 units (OTUs) were curated using the LULU package v.0.1.0<sup>87</sup>. An OTU by sample table was  
390 produced by mapping the merged and trimmed reads against the curated OTUs using  
391 USEARCH, with the raw query read assigned to the OTU with the best match (highest bit score)  
392 within 97% identity. The OTU x sample table was filtered in R as follows. To minimise the  
393 chance of spurious OTUs being included in the final dataset any record with less than 3 raw reads  
394 were changed to zero and any OTU that did not appear in more than one sample was removed  
395 from the analysis. OTUs found in negative controls were removed from the analysis.

396

### 397 *Taxonomic assignment*

398 Assigning correct taxonomy to an unknown set of DNA sequences can be challenging as  
399 reference databases are incomplete, contain errors and the taxonomy of some marine groups is  
400 uncertain. With such limitations in mind, we assigned taxonomy using a BLAST v.2.6.0+  
401 search<sup>88</sup> returning the single best hit (largest bit score) from databases within 97% of the query  
402 using a custom R script to parse the raw blast results. In the case of multiple sequences attaining

403 equal bit scores for a given OTU an assignment was only made if all reference sequences  
404 belonged to the same species. The MIDORI database (UNIQUE\_20180221)<sup>89</sup> was used for the  
405 COI data and the SILVA database (SSU r132, subset to contain only Eukaryotes)<sup>90</sup> was used for  
406 the 18S rRNA data. The match taxa tool from the World Register of Marine Species<sup>91</sup> was used  
407 to filter the data to include only marine species and check the taxonomic classification. The  
408 World Register of Introduced Marine Species<sup>92</sup> contains a range of peer-reviewed and technical  
409 reports on the global introduced status of a large number of species, we used the online match  
410 taxa tool to determine the non-indigenous status of annotations that could be assigned taxonomy  
411 from the World Register of Marine Species.

412  
413 *Statistical analyses*

414 All statistical analyses were conducted in R v.3.5.0. The Vegan R package v.2.5.2<sup>93</sup> was used to  
415 rarefy samples to the minimum sample read depth for each amplicon. The number of OTUs per  
416 site/condition was calculated as the number of OTUs with a non-zero number of normalized  
417 reads after summing the reads across all three site level replicates. To test if there was a  
418 significant difference between the number of OTUs generated by sediment and water eDNA,  
419 individual non-summed replicate sample data was used to build a two-way ANOVA model with  
420 the formula *number\_of\_OTUs~sedimentorwater\*site* implemented in R using the function *aov()*.  
421 Non-metric multidimensional scaling ordination plots were generated from Bray-Curtis  
422 dissimilarity values derived using Vegan. A Permutation Analysis of Variance  
423 (PERMANOVA)<sup>94</sup> was performed using the Bray Curtis dissimilarity following the model  
424 *dissimilarity\_matrix~sedimentorwater\*site* implemented in R using the function *adonis* from the  
425 *vegan* package. OTUs with taxonomic assignment were separated into those found in sediment,  
426 water or both media and the OTUs were then collapsed at the Phylum level to explore taxonomic  
427 patterns of detection in water or sediment. Phyla with less than eight OTUs were combined and  
428 represented under category named “other”. To test for non-random counts of species detection  
429 between water and sediment within taxa an exact binomial test was performed between counts of  
430 species detected in water and sediment. The number of species detected in both water and  
431 sediment were halved and the value added to the counts for each sample type with non-integer  
432 values conservatively rounded down to the nearest whole number. A correction for multiple  
433 comparisons<sup>95</sup> was applied across the p values from the exact binomial tests generated by the R

434 function binom.test(). Records from rapid assessment surveys previously conducted for non-  
435 native invertebrates at the sample sites<sup>46-48</sup> were compared with the detected species from  
436 metabarcoding data.

437

438

439

440

441

442

443

#### 444 **References**

- 445 1 Sala, E. & Knowlton, N. Global marine biodiversity trends. *Annual Review of*  
446 *Environment and Resources* **31**, 93-122, doi:10.1146/annurev.energy.31.020105.100235  
447 (2006).
- 448 2 Butchart, S. H. M. *et al.* Global biodiversity: indicators of recent declines. *Science* **328**,  
449 1164-1168, doi:10.1126/science.1187512 (2010).
- 450 3 Worm, B. *et al.* Impacts of biodiversity loss on ocean ecosystem services. *Science* **314**,  
451 787-790, doi:10.1126/science.1132294 (2006).
- 452 4 Oliver, I. & Beattie, A. J. A possible method for the rapid assessment of biodiversity.  
453 *Conservation Biology* **7**, 562-568, doi:DOI 10.1046/j.1523-1739.1993.07030562.x  
454 (1993).
- 455 5 Fitzpatrick, M. C., Preisser, E. L., Ellison, A. M. & Elkinton, J. S. Observer bias and the  
456 detection of low-density populations. *Ecological Applications* **19**, 1673-1679 (2009).
- 457 6 Ashton, G., Books, K., Shucksmith, R. & Cook, E. Rapid assessment of the distribution  
458 of marine non-native species in marinas in Scotland. *Aquatic Invasions* **1**, 209-213  
459 (2006).
- 460 7 Bishop, J. D., Wood, C. A., Leveque, L., Yunnice, A. L. & Viard, F. Repeated rapid  
461 assessment surveys reveal contrasting trends in occupancy of marinas by non-indigenous  
462 species on opposite sides of the western English Channel. *Marine Pollution Bulletin* **95**,  
463 699-706, doi:10.1016/j.marpolbul.2014.11.043 (2015).

- 464 8 Appeltans, W. *et al.* The magnitude of global marine species diversity. *Current Biology*  
465 **22**, 2189-2202, doi:10.1016/j.cub.2012.09.036 (2012).
- 466 9 Pérez-Portela, R., Arranz, V., Rius, M. & Turon, X. Cryptic speciation or global spread?  
467 The case of a cosmopolitan marine invertebrate with limited dispersal capabilities.  
468 *Scientific Reports* **3**, 3197, doi:10.1038/srep03197. (2013).
- 469 10 Rius, M. & Teske, P. R. Cryptic diversity in coastal Australasia: a morphological and  
470 mitonuclear genetic analysis of habitat-forming sibling species. *Zool J Linn Soc-Lond*  
471 **168**, 597-611, doi:10.1111/zoj.12036 (2013).
- 472 11 Thomsen, P. F. & Willerslev, E. Environmental DNA - an emerging tool in conservation  
473 for monitoring past and present biodiversity. *Biological Conservation* **183**, 4-18,  
474 doi:10.1016/j.biocon.2014.11.019 (2015).
- 475 12 Turner, C. R. *et al.* Particle size distribution and optimal capture of aqueous microbial  
476 eDNA. *Methods in Ecology and Evolution* **5**, 676-684, doi:10.1111/2041-210x.12206  
477 (2014).
- 478 13 Sassoubre, L. M., Yamahara, K. M., Gardner, L. D., Block, B. A. & Boehm, A. B.  
479 Quantification of environmental DNA (eDNA) shedding and decay rates for three marine  
480 fish. *Environmental Science & Technology* **50**, 10456-10464,  
481 doi:10.1021/acs.est.6b03114 (2016).
- 482 14 Dougherty, M. M. *et al.* Environmental DNA (eDNA) detects the invasive rusty crayfish  
483 *Orconectes rusticus* at low abundances. *Journal of Applied Ecology* **53**, 722-732,  
484 doi:10.1111/1365-2664.12621 (2016).
- 485 15 Simpson, T. J. S., Dias, P. J., Snow, M., Muñoz, J. & Berry, T. Real-time PCR detection  
486 of *Didemnum perlucidum* (Monniot, 1983) and *Didemnum vexillum* (Kott, 2002) in an  
487 applied routine marine biosecurity context. *Molecular Ecology Resources* **17**, 443-453,  
488 doi:10.1111/1755-0998.12581 (2017).
- 489 16 Wood, S. A., Zaiko, A., Richter, I., Inglis, G. J. & Pochon, X. Development of a real-time  
490 polymerase chain reaction assay for the detection of the invasive Mediterranean fanworm,  
491 *Sabella spallanzanii*, in environmental samples. *Environmental Science and Pollution*  
492 *Research* **24**, 17373-17382, doi:10.1007/s11356-017-9357-y (2017).
- 493 17 Kim, P., Kim, D., Yoon, T. J. & Shin, S. Early detection of marine invasive species,  
494 *Bugula neritina* (Bryozoa: Cheilostomatida), using species-specific primers and



- 495 environmental DNA analysis in Korea. *Marine Environmental Research* **139**, 1-10,  
496 doi:10.1016/j.marenvres.2018.04.015 (2018).
- 497 18 Borrell, Y. J., Miralles, L., Do Huu, H., Mohammed-Geba, K. & Garcia-Vazquez, E.  
498 DNA in a bottle-rapid metabarcoding survey for early alerts of invasive species in ports.  
499 *PLoS One* **12**, e0183347, doi:10.1371/journal.pone.0183347 (2017).
- 500 19 Lacoursiere-Roussel, A. *et al.* eDNA metabarcoding as a new surveillance approach for  
501 coastal Arctic biodiversity. *Ecology and Evolution* **8**, 7763-7777, doi:10.1002/ece3.4213  
502 (2018).
- 503 20 Grey, E. K. *et al.* Effects of sampling effort on biodiversity patterns estimated from  
504 environmental DNA metabarcoding surveys. *Scientific Reports* **8**, 8843,  
505 doi:10.1038/s41598-018-27048-2 (2018).
- 506 21 McQuillan, J. S. & Robidart, J. C. Molecular-biological sensing in aquatic environments:  
507 recent developments and emerging capabilities. *Current Opinion in Biotechnology* **45**,  
508 43-50, doi:10.1016/j.copbio.2016.11.022 (2017).
- 509 22 Goldberg, C. S. *et al.* Critical considerations for the application of environmental DNA  
510 methods to detect aquatic species. *Methods in Ecology and Evolution* **7**, 1299-1307,  
511 doi:10.1111/2041-210x.12595 (2016).
- 512 23 Alberdi, A., Aizpurua, O., Gilbert, M. T. P. & Bohmann, K. Scrutinizing key steps for  
513 reliable metabarcoding of environmental samples. *Methods in Ecology and Evolution* **9**,  
514 134-147, doi:10.1111/2041-210x.12849 (2018).
- 515 24 Deiner, K. *et al.* Environmental DNA metabarcoding: Transforming how we survey  
516 animal and plant communities. *Molecular Ecology* **26**, 5872-5895,  
517 doi:10.1111/mec.14350 (2017).
- 518 25 Anton, A. *et al.* Global ecological impacts of marine exotic species. *Nature Ecology &*  
519 *Evolution* **3**, 787-800, doi:10.1038/s41559-019-0851-0 (2019).
- 520 26 Bax, N., Williamson, A., Agüero, M., Gonzalez, E. & Geeves, W. Marine invasive alien  
521 species: a threat to global biodiversity. *Marine Policy* **27**, 313-323, doi:10.1016/S0308-  
522 597x(03)00041-1 (2003).
- 523 27 Lovell, S., Stone, S. & Fernandez, L. The Economic Impacts of Aquatic Invasive Species:  
524 A Review of the Literature. *Agricultural and Resource Economics Review* **35**, 195-208,  
525 doi:10.1017/S1068280500010157 (2006).

- 526 28 Ricciardi, A., Hoopes, M. F., Marchetti, M. P. & Lockwood, J. L. Progress toward  
527 understanding the ecological impacts of nonnative species. *Ecological Monographs* **83**,  
528 263-282, doi:10.1890/13-0183.1 (2013).
- 529 29 Mazza, G., Tricarico, E., Genovesi, P. & Gherardi, F. Biological invaders are threats to  
530 human health: an overview. *Ethology Ecology & Evolution* **26**, 112-129,  
531 doi:10.1080/03949370.2013.863225 (2014).
- 532 30 Molnar, J. L., Gamboa, R. L., Revenga, C. & Spalding, M. D. Assessing the global threat  
533 of invasive species to marine biodiversity. *Frontiers in Ecology and the Environment* **6**,  
534 485-492, doi:10.1890/070064 (2008).
- 535 31 Nunes, A. L., Katsanevakis, S., Zenetos, A. & Cardoso, A. C. Gateways to alien  
536 invasions in the European seas. *Aquatic Invasions* **9**, 133-144, doi:10.3391/ai.2014.9.2.02  
537 (2014).
- 538 32 Murray, C. C., Pakhomov, E. A. & Therriault, T. W. Recreational boating: a large  
539 unregulated vector transporting marine invasive species. *Diversity and Distributions* **17**,  
540 1161-1172, doi:10.1111/j.1472-4642.2011.00798.x (2011).
- 541 33 Airoidi, L., Turon, X., Perkol-Finkel, S. & Rius, M. Corridors for aliens but not for  
542 natives: effects of marine urban sprawl at a regional scale. *Diversity and Distributions* **21**,  
543 755-768, doi:10.1111/ddi.12301 (2015).
- 544 34 Glasby, T. M., Connell, S. D., Holloway, M. G. & Hewitt, C. L. Nonindigenous biota on  
545 artificial structures: could habitat creation facilitate biological invasions? *Marine Biology*  
546 **151**, 887-895, doi:10.1007/s00227-006-0552-5 (2006).
- 547 35 Dafforn, K. A., Johnston, E. L. & Glasby, T. M. Shallow moving structures promote  
548 marine invader dominance. *Biofouling* **25**, 277-287, doi:10.1080/08927010802710618  
549 (2009).
- 550 36 Rivero, N. K., Dafforn, K. A., Coleman, M. A. & Johnston, E. L. Environmental and  
551 ecological changes associated with a marina. *Biofouling* **29**, 803-815,  
552 doi:10.1080/08927014.2013.805751 (2013).
- 553 37 Foster, V., Giesler, R. J., Wilson, A. M. W., Nall, C. R. & Cook, E. J. Identifying the  
554 physical features of marina infrastructure associated with the presence of non-native  
555 species in the UK. *Marine Biology* **163**, 163-173, doi:10.1007/s00227-016-2941-8  
556 (2016).

- 557 38 Deiner, K. *et al.* Optimising the detection of marine taxonomic richness using  
558 environmental DNA metabarcoding: the effects of filter material, pore size and extraction  
559 method. *Metabarcoding and Metagenomics* **2**, doi:10.3897/mbmg.2.28963 (2018).
- 560 39 Spens, J. *et al.* Comparison of capture and storage methods for aqueous microbial eDNA  
561 using an optimized extraction protocol: advantage of enclosed filter. *Methods in Ecology*  
562 *and Evolution* **8**, 635-645, doi:10.1111/2041-210x.12683 (2017).
- 563 40 Sellers, G. S., Di Muri, C., Gómez, A. & Hänfling, B. Mu-DNA: a modular universal  
564 DNA extraction method adaptable for a wide range of sample types. *Metabarcoding and*  
565 *Metagenomics* **2**, e24556, doi:10.17504/protocols.io.qn9dvh6) (2018).
- 566 41 Koziol, A. *et al.* Environmental DNA metabarcoding studies are critically affected by  
567 substrate selection. *Molecular Ecology Resources* **19**, 366-376, doi:10.1111/1755-  
568 0998.12971 (2019).
- 569 42 Hermans, S. M., Buckley, H. L. & Lear, G. Optimal extraction methods for the  
570 simultaneous analysis of DNA from diverse organisms and sample types. *Molecular*  
571 *Ecology Resources* **18**, 557-569, doi:10.1111/1755-0998.12762 (2018).
- 572 43 Shaw, J. L. A. *et al.* Comparison of environmental DNA metabarcoding and conventional  
573 fish survey methods in a river system. *Biological Conservation* **197**, 131-138,  
574 doi:10.1016/j.biocon.2016.03.010 (2016).
- 575 44 Leray, M. & Knowlton, N. Censusing marine eukaryotic diversity in the twenty-first  
576 century. *Philosophical Transactions of the Royal Society B: Biological Sciences* **371**,  
577 doi:10.1098/rstb.2015.0331 (2016).
- 578 45 Mohrbeck, I., Raupach, M. J., Martinez Arbizu, P., Knebelsberger, T. & Laakmann, S.  
579 High-throughput sequencing - the key to rapid biodiversity assessment of marine  
580 metazoa? *PLoS One* **10**, e0140342, doi:10.1371/journal.pone.0140342 (2015).
- 581 46 Wood, C. A., Bishop, J. D. D. & Yunnice, A. L. E. RAS 2014: non-native species rapid  
582 assessment surveys in English marinas. 34pp (2015).
- 583 47 Wood, C. A., Bishop, J. D. D. & Yunnice, A. L. E. Comprehensive Reassessment of NNS  
584 in Welsh Marinas. 42pp (2015).
- 585 48 Wood, C. A., Bishop, J. D. D., Rennocks, L. & Crundwell, R. RAS 2015: non-native  
586 species rapid assessment surveys in English marinas (E Anglia & W coast). 34pp (2016).

- 587 49 Torti, A., Lever, M. A. & Jorgensen, B. B. Origin, dynamics, and implications of  
588 extracellular DNA pools in marine sediments. *Marine Genomics* **24 Pt 3**, 185-196,  
589 doi:10.1016/j.margen.2015.08.007 (2015).
- 590 50 Barnes, M. A. & Turner, C. R. The ecology of environmental DNA and implications for  
591 conservation genetics. *Conservation Genetics* **17**, 1-17, doi:10.1007/s10592-015-0775-4  
592 (2016).
- 593 51 Nascimento, F. J. A., Lallias, D., Bik, H. M. & Creer, S. Sample size effects on the  
594 assessment of eukaryotic diversity and community structure in aquatic sediments using  
595 high-throughput sequencing. *Scientific reports* **8**, 11737, doi:10.1038/s41598-018-30179-  
596 1 (2018).
- 597 52 O'Donnell, J. L. *et al.* Spatial distribution of environmental DNA in a nearshore marine  
598 habitat. *PeerJ* **5**, e3044, doi:10.7717/peerj.3044 (2017).
- 599 53 Jeunen, G. J. *et al.* Environmental DNA (eDNA) metabarcoding reveals strong  
600 discrimination among diverse marine habitats connected by water movement. *Molecular*  
601 *Ecology Resources* **19**, 426-438, doi:10.1111/1755-0998.12982 (2019).
- 602 54 Wangenstein, O. S., Palacin, C., Guardiola, M. & Turon, X. DNA metabarcoding of  
603 littoral hard-bottom communities: high diversity and database gaps revealed by two  
604 molecular markers. *PeerJ* **6**, e4705, doi:10.7717/peerj.4705 (2018).
- 605 55 Wangenstein, O. S. & Turon, X. in *Marine Animal Forests: The Ecology of Benthic*  
606 *Biodiversity Hotspots* (eds S. Rossi, L. Bramanti, A. Gori, & C. Orejas) Ch.  
607 Metabarcoding techniques for assessing biodiversity of marine animal forests, 445-473  
608 (Springer, 2017).
- 609 56 Pawlowski, J. *et al.* The future of biotic indices in the ecogenomic era: Integrating  
610 (e)DNA metabarcoding in biological assessment of aquatic ecosystems. *Science of the*  
611 *Total Environment* **637-638**, 1295-1310, doi:10.1016/j.scitotenv.2018.05.002 (2018).
- 612 57 Aylagas, E., Borja, A., Muxika, I. & Rodríguez-Ezpeleta, N. Adapting metabarcoding-  
613 based benthic biomonitoring into routine marine ecological status assessment networks.  
614 *Ecological Indicators* **95**, 194-202, doi:10.1016/j.ecolind.2018.07.044 (2018).
- 615 58 Ficetola, G. F. *et al.* DNA from lake sediments reveals long-term ecosystem changes after  
616 a biological invasion. *Science Advances* **4**, eaar4292, doi:10.1126/sciadv.aar4292 (2018).

- 617 59 Pedersen, M. W. *et al.* Postglacial viability and colonization in North America's ice-free  
618 corridor. *Nature* **537**, 45, doi:10.1038/nature19085 (2016).
- 619 60 Balint, M. *et al.* Environmental DNA time series in ecology. *Trends in Ecology &*  
620 *Evolution* **33**, 945-957, doi:10.1016/j.tree.2018.09.003 (2018).
- 621 61 Scott, R. *et al.* Optimization and performance testing of a sequence processing pipeline  
622 applied to detection of nonindigenous species. *Evolutionary Applications* **11**, 891-905,  
623 doi:10.1111/eva.12604 (2018).
- 624 62 Stachowicz, J. J. & Byrnes, J. E. Species diversity, invasion success, and ecosystem  
625 functioning: disentangling the influence of resource competition, facilitation, and  
626 extrinsic factors. *Marine Ecology Progress Series* **311**, 251-262, doi:DOI  
627 10.3354/meps311251 (2006).
- 628 63 Sutherland, J. P. & Karlson, R. H. Development and stability of the fouling community at  
629 Beaufort, North Carolina. *Ecological Monographs* **47**, 425-446 (1977).
- 630 64 Bachelet, G. *et al.* A round-the-world tour almost completed: first records of the invasive  
631 mussel *Musculista senhousia* in the north-east Atlantic (southern Bay of Biscay). *Marine*  
632 *Biodiversity Records* **2**, 2002–2005, doi:10.1017/s1755267209001080 (2009).
- 633 65 Crooks, J. A. Assessing invader roles within changing ecosystems: historical and  
634 experimental perspectives on an exotic mussel in an urbanized lagoon. *Biological*  
635 *Invasions* **3**, 23-36 (2001).
- 636 66 Mistri, M. The non-indigenous mussel *Musculista senhousia* in an Adriatic lagoon:  
637 Effects on benthic community over a ten year period. *Journal of the Marine Biological*  
638 *Association of the United Kingdom* **83**, 1277-1278, doi:10.1017/S0025315403008658  
639 (2003).
- 640 67 Kushner, R. B. & Hovel, K. A. Effects of native predators and eelgrass habitat structure  
641 on the introduced Asian mussel *Musculista senhousia* (Benson in Cantor) in southern  
642 California. *Journal of Experimental Marine Biology and Ecology* **332**, 166-177,  
643 doi:10.1016/j.jembe.2005.11.011 (2006).
- 644 68 Crooks, J. A. & Khim, H. S. Architectural vs. biological effects of a habitat-altering,  
645 exotic mussel, *Musculista senhousia*. *Journal of Experimental Marine Biology and*  
646 *Ecology* **240**, 53-75, doi:Doi 10.1016/S0022-0981(99)00041-6 (1999).

- 647 69 Barfield, P., Holmes, A., Watson, G. & Rowe, G. First evidence of *Arcuatula senhousia*  
648 (Benson, 1842), the asian date mussel in UK waters. *Journal of Conchology* **43**, 217-222  
649 (2018).
- 650 70 Turner, A. D. *et al.* New invasive nemertean species (*Cephalothrix simula*) in England  
651 with high levels of tetrodotoxin and a microbiome linked to toxin metabolism. *Mar Drugs*  
652 **16**, doi:10.3390/md16110452 (2018).
- 653 71 Elbrecht, V. & Steinke, D. Scaling up DNA metabarcoding for freshwater  
654 macrozoobenthos monitoring. *Freshwater Biol* **64**, 380-387, doi:10.1111/fwb.13220  
655 (2019).
- 656 72 Wood, S. A. *et al.* Considerations for incorporating real-time PCR assays into routine  
657 marine biosecurity surveillance programmes: a case study targeting the Mediterranean  
658 fanworm (*Sabella spallanzanii*) and club tunicate (*Styela clava*). *Genome* **0**, 1-10,  
659 doi:10.1139/gen-2018-0021 (2018).
- 660 73 Blackman, R. C. *et al.* Detection of a new non-native freshwater species by DNA  
661 metabarcoding of environmental samples – first record of *Gammarus fossarum* in the UK.  
662 *Aquatic Invasions* **12**, 177-189, doi:10.3391/ai.2017.12.2.06 (2017).
- 663 74 Jarman, S. N., Berry, O. & Bunce, M. The value of environmental DNA biobanking for  
664 long-term biomonitoring. *Nature Ecology and Evolution* **2**, 1192-1193,  
665 doi:10.1038/s41559-018-0614-3 (2018).
- 666 75 Pearce, F., Peeler, E. & Stebbing, P. Modelling the risk of the introduction and spread of  
667 non-indigenous species in the UK and Ireland. *Project Report for E5405W. CEFAS*  
668 (2012).
- 669 76 Bishop, J. D. D., Wood, C. A., Yunnice, A. L. E. & Griffiths, C. A. Unheralded arrivals:  
670 non-native sessile invertebrates in marinas on the English coast. *Aquatic Invasions* **10**,  
671 249-264, doi:10.3391/ai.2015.10.3.01 (2015).
- 672 77 Calewaert, J. B., Weaver, P., Gunn, V., Gorringer, P. & Novellino, A. in *Quantitative*  
673 *Monitoring of the Underwater Environment: Results of the International Marine Science*  
674 *and Technology Event MOQESM '14 in Brest, France* (eds B. Zerr *et al.*) 31-46  
675 (Springer International Publishing, 2016).
- 676 78 Renshaw, M. A., Olds, B. P., Jerde, C. L., McVeigh, M. M. & Lodge, D. M. The room  
677 temperature preservation of filtered environmental DNA samples and assimilation into a

- 678 phenol-chloroform-isoamyl alcohol DNA extraction. *Molecular Ecology Resources* **15**,  
679 168-176, doi:10.1111/1755-0998.12281 (2015).
- 680 79 Leray, M. *et al.* A new versatile primer set targeting a short fragment of the mitochondrial  
681 COI region for metabarcoding metazoan diversity: application for characterizing coral  
682 reef fish gut contents. *Frontiers in Zoology* **10**, 34, doi:10.1186/1742-9994-10-34 (2013).
- 683 80 Zhan, A. *et al.* High sensitivity of 454 pyrosequencing for detection of rare species in  
684 aquatic communities. *Methods in Ecology and Evolution* **4**, 558-565, doi:10.1111/2041-  
685 210x.12037 (2013).
- 686 81 Bista, I. *et al.* Annual time-series analysis of aqueous eDNA reveals ecologically relevant  
687 dynamics of lake ecosystem biodiversity. *Nature Communications* **8**, 14087,  
688 doi:10.1038/ncomms14087 (2017).
- 689 82 MacConaill, L. E. *et al.* Unique, dual-indexed sequencing adapters with UMIs effectively  
690 eliminate index cross-talk and significantly improve sensitivity of massively parallel  
691 sequencing. *BMC Genomics* **19**, 30, doi:10.1186/s12864-017-4428-5 (2018).
- 692 83 R\_Core\_Team. R: a language and environment for statistical computing. *ISBN 3-900051-*  
693 *07-0* (2018).
- 694 84 Edgar, R. C. UPARSE: highly accurate OTU sequences from microbial amplicon reads.  
695 *Nature Methods* **10**, 996-998, doi:10.1038/nmeth.2604 (2013).
- 696 85 Martin, M. Cutadapt removes adapter sequences from high-throughput sequencing reads.  
697 *EMBnet Journal* **17**, 10-12 (2011).
- 698 86 Rognes, T., Flouri, T., Nichols, B., Quince, C. & Mahe, F. VSEARCH: a versatile open  
699 source tool for metagenomics. *PeerJ* **4**, e2584, doi:10.7717/peerj.2584 (2016).
- 700 87 Frøslev, T. G. *et al.* Algorithm for post-clustering curation of DNA amplicon data yields  
701 reliable biodiversity estimates. *Nature Communications* **8**, 1188, doi:10.1038/s41467-  
702 017-01312-x (2017).
- 703 88 Camacho, C. *et al.* BLAST+: architecture and applications. *BMC Bioinformatics* **10**, 421,  
704 doi:10.1186/1471-2105-10-421 (2009).
- 705 89 Machida, R. J., Leray, M., Ho, S. L. & Knowlton, N. Metazoan mitochondrial gene  
706 sequence reference datasets for taxonomic assignment of environmental samples.  
707 *Scientific Data* **4**, 170027, doi:10.1038/sdata.2017.27 (2017).

- 708 90 Quast, C. *et al.* The SILVA ribosomal RNA gene database project: improved data  
709 processing and web-based tools. *Nucleic Acids Research* **41**, D590-596,  
710 doi:10.1093/nar/gks1219 (2013).
- 711 91 WoRMS\_Editorial\_Board. *World Register of Marine Species*,  
712 <<http://www.marinespecies.org>> (2019).
- 713 92 Ahyong, S. *et al.* *World Register of Introduced Marine Species (WRiMS)*,  
714 <[www.marinespecies.org/introduced](http://www.marinespecies.org/introduced)> (2019).
- 715 93 Oksanen, J. *et al.* Vegan: community ecology package. *R package* **1**, 17 (2011).
- 716 94 Anderson, M. J. in *Wiley Stats Ref: Statistics Reference Online* (eds N. Balakrishnan *et*  
717 *al.*) 1-15 (John Wiley & Sons, Ltd, 2014).
- 718 95 Benjamini, Y. & Hochberg, Y. Controlling the false discovery rate - a practical and  
719 powerful approach to multiple testing. *J R Stat Soc B* **57**, 289-300 (1995).

720

721

722

723

724

## 725 **Acknowledgements**

726 We are grateful to John Bishop and Chris Wood from the Marine Biological Association of the  
727 United Kingdom for sharing information on marinas and their excellent NIS survey data. We  
728 thank the staff of the Environmental Sequencing Facility from the National Oceanography Centre  
729 Southampton for advice and assistance during library preparation. We thank Dr Ivan Haigh for  
730 assistance in accessing remote sensing data. We acknowledge the Department of Geography and  
731 Environment from the University of Southampton for access to coring equipment and laboratory  
732 space. LH was supported by the Natural Environmental Research Council (grant number  
733 NE/L002531/1).

734

## 735 **Competing Interests**

736 The authors declare no competing interests.

737

## 738 **Author Contributions**



739 L.E.H. and M.R. designed the experiment, L.E.H. collected samples, generated and analysed the  
740 data, designed all figures and wrote the first draft of the paper. L.E.H, M.B., S.C., G.C., J.R. and  
741 M.R. contributed critically to further manuscript drafts and gave final approval for publication.

742

#### 743 **Data Availability**

744 Raw Illumina sequencing data is available from the European Nucleotide Archive under  
745 accession number \$\$\$ (data will be uploaded upon acceptance, available to reviewers upon  
746 request).

747 Associated metadata, script and intermediate files are available online via Zenodo with the  
748 following DOI: 10.5281/zenodo.1453958

749 .

750

751

752

753

754

755

756

757

758 **Figures**

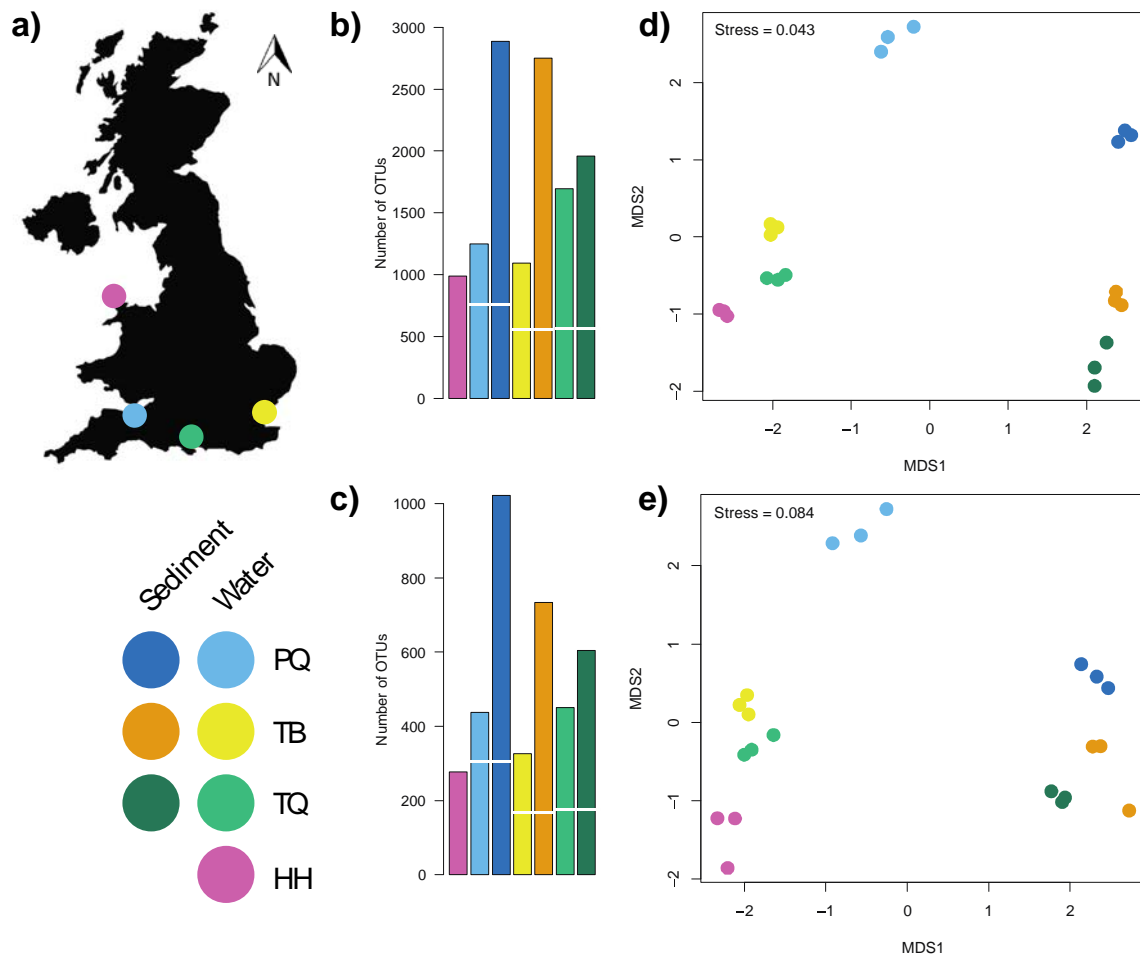

759  
 760 **Fig. 1.** a Map of the United Kingdom indicating the geographic position of the sampled sites, a  
 761 legend indicates the four sites (PQ, TB, TQ and HH) and colours for water and sediment eDNA  
 762 samples for each site. Barplots detailing number of OTUs (operational taxonomic units) detected  
 763 across sampling sites and eDNA sample type for b COI and c 18S rRNA metabarcoding of UK  
 764 marinas, the break in bars indicates the number of shared OTUs between sediment and water  
 765 eDNA samples. Non-metric multidimensional scaling ordination plots based on Bray-Curtis  
 766 dissimilarities between: c COI and d 18S rRNA metabarcoding of marina sediment and water  
 767 eDNA samples.

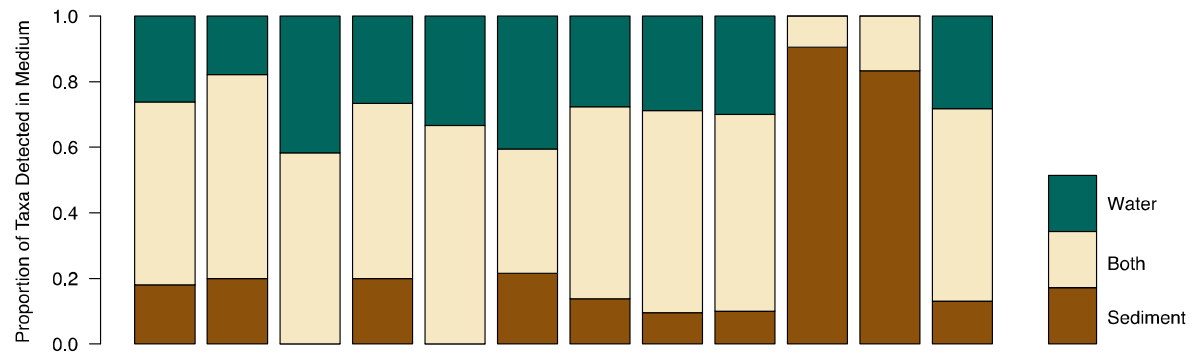

768  
769 **Fig. 2.** Horizontal stacked bar chart detailing proportion of operational taxonomic units detected  
770 in eDNA from sediment, water or both sediment and water across the 14 phyla for pooled 18S  
771 rRNA and COI metabarcoding of marinas in the United Kingdom.  
772

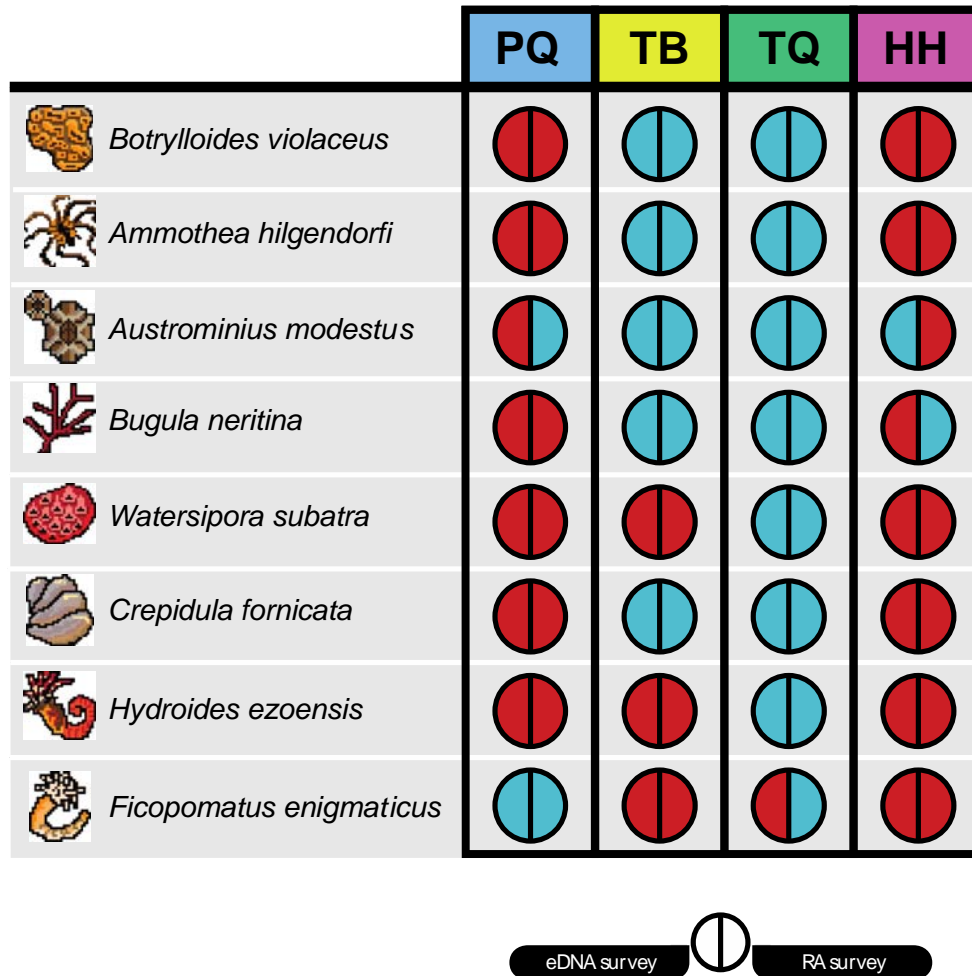

773  
 774 **Fig. 3.** Incidence diagram for seven non-indigenous species across four sampling sites. For each  
 775 species-location the left semi-circle indicates the detection using eDNA metabarcoding surveys  
 776 of 18S rRNA and COI fragments, and the right semi-circle indicates the detection from rapid  
 777 assessment (RA) surveys. Blue indicates a positive detection for that species-location and red  
 778 indicates no detection.  
 779
